# Supplementary material for: Aqueous (co)polymer stabilisers for size-controlled 2–5 nm gold nanoparticle synthesis with tuneable catalytic activity
Source: Royal Society of Chemistry journal article supplement (doi:10.1039/d2nj03257k), 2022-01-01
Supplement: d2nj03257k1.pdf [file d2nj03257k1.pdf]

## Aqueous (co)polymer stabilisers for size-controlled 2-5 nm gold nanoparticle synthesis with tuneable catalytic activity

Daniel J. Traynor,<sup>a</sup> Elena Ureña-Horno,<sup>a</sup> James J. Hobson,<sup>ab</sup> Elliot J. Croft,<sup>a</sup> Stephanie E. Edwards<sup>a</sup>, Steve P. Rannard<sup>ab</sup> and Marco Giardiello.<sup>a\*</sup>

<sup>a</sup>Department of Chemistry, University of Liverpool, Crown Street, Liverpool, L69 7ZD, UK

<sup>b</sup>Centre of Excellence for Long-acting Therapeutics, University of Liverpool, West Derby Street, Liverpool, L7 8TX

E-mail: marco.giardiello@liverpool.ac.uk

### Supplementary Information

|                           |                                                                                                                                        | Pages    |
|---------------------------|----------------------------------------------------------------------------------------------------------------------------------------|----------|
| <b>Figures S1 to S11</b>  | <sup>1</sup> H- NMR spectra for all homo-polymers and (co) polymers                                                                    | 2 to 7   |
| <b>Figure S12</b>         | Salt stability studies for AuNP dispersions prepared with linear polymeric stabilisers                                                 | 8        |
| <b>Figure S13</b>         | Salt stability studies for AuNP dispersions prepared with branched polymeric stabilisers                                               | 9        |
| <b>Figures S14 to S23</b> | UV-vis data and kinetic plots for catalytic reduction of 4-NP to 4-AP employing AuNPs prepared with all homo-polymers and (co)polymers | 10 to 19 |
| <b>Table S1</b>           | All calculated apparent rate constants ( $k_{app}$ ) and induction times ( $t_i$ ) for the catalytic reduction studies of 4-NP to 4-AP | 20       |

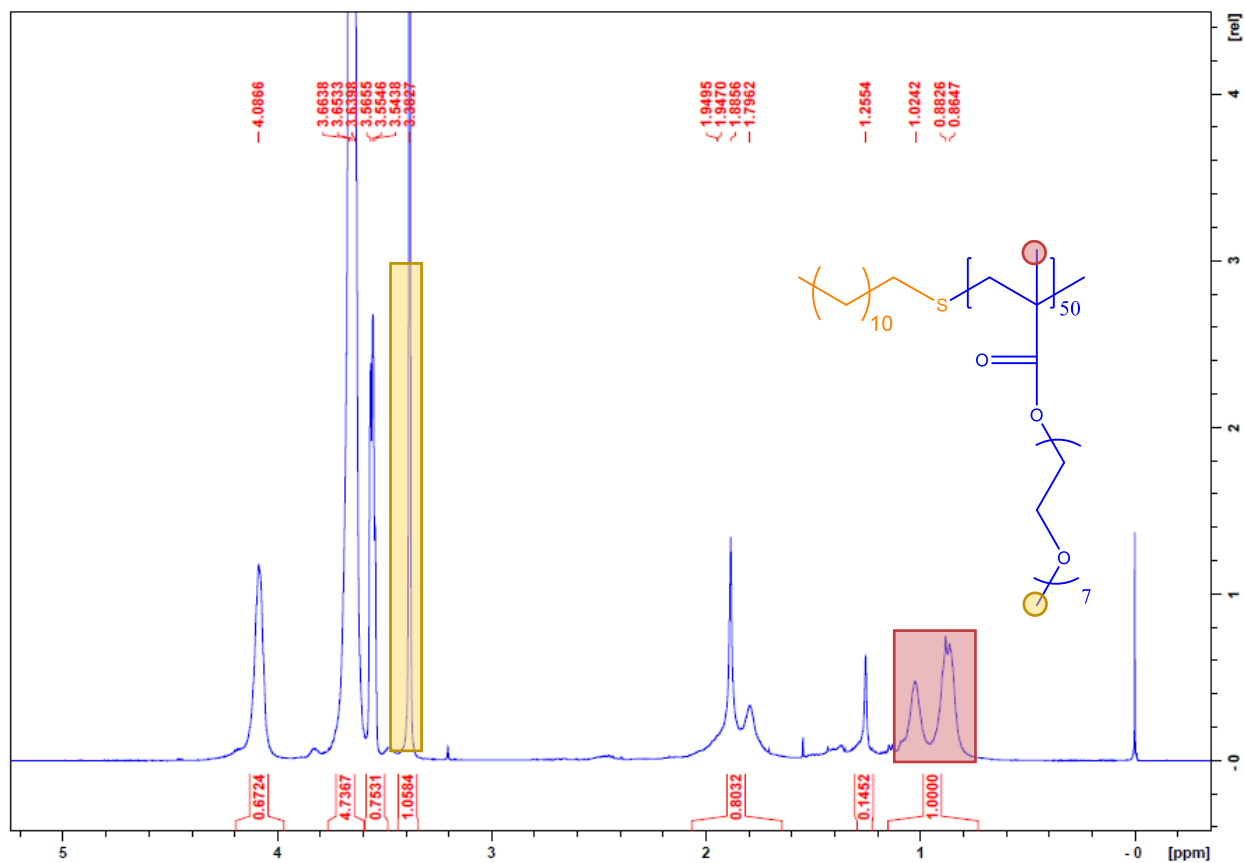

Figure S1.  $^1\text{H}$  NMR spectrum of linear homo-polymer DDT-*p*(OEGMA<sub>50</sub>)

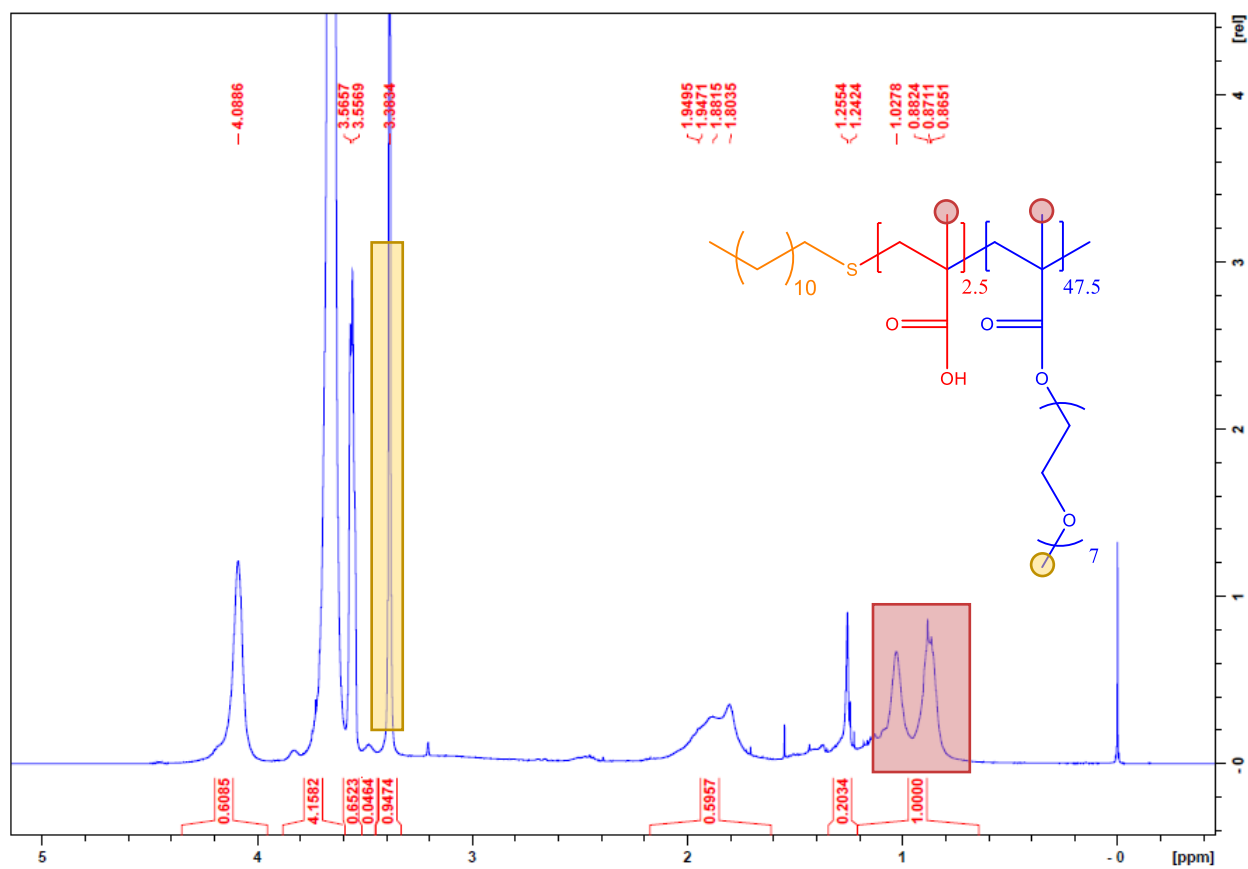

Figure S2.  $^1\text{H}$  NMR spectrum of linear (co)polymer DDT-*p*(OEGMA<sub>47.5</sub>-*co*-MAA<sub>2.5</sub>)

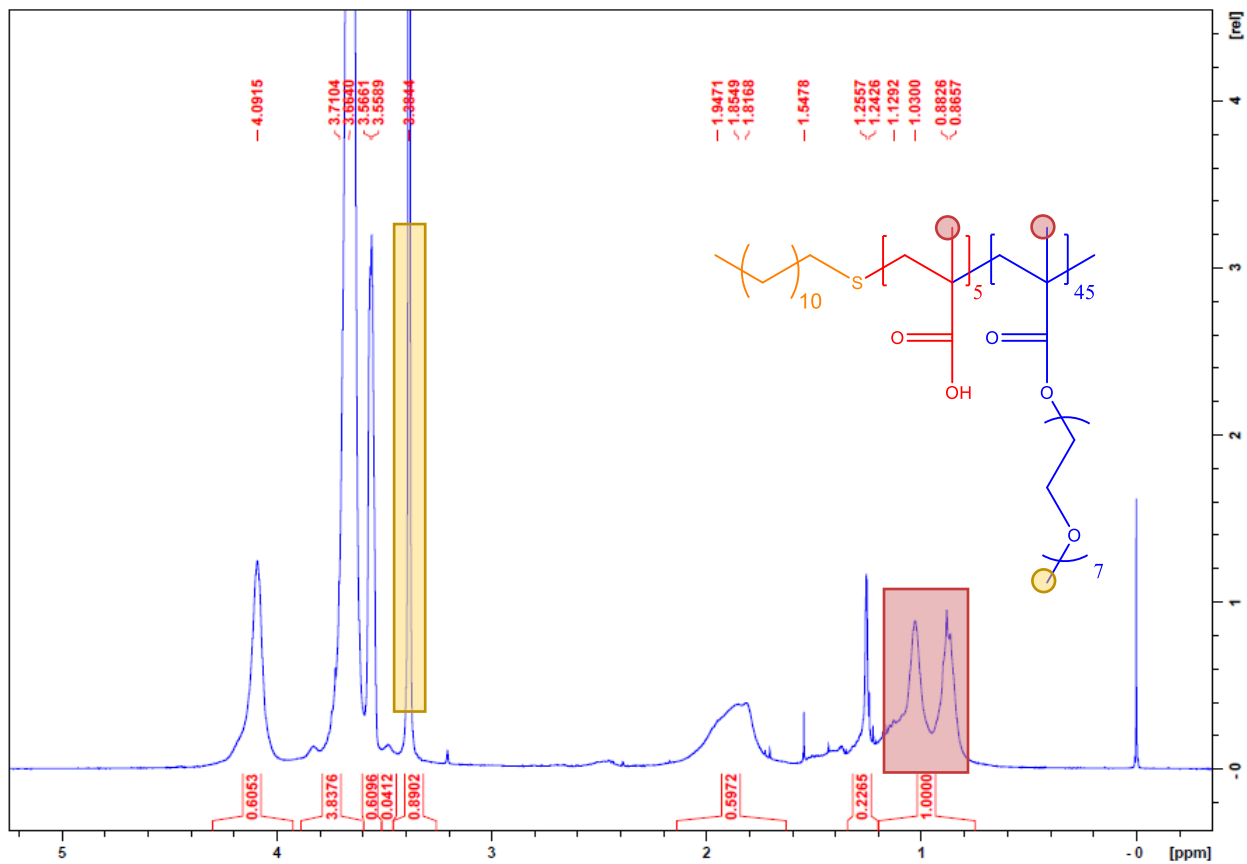

Figure S3.  $^1\text{H}$  NMR spectrum of linear (co)polymer DDT-*p*(OEGMA<sub>45</sub>-*co*-MAA<sub>5</sub>)

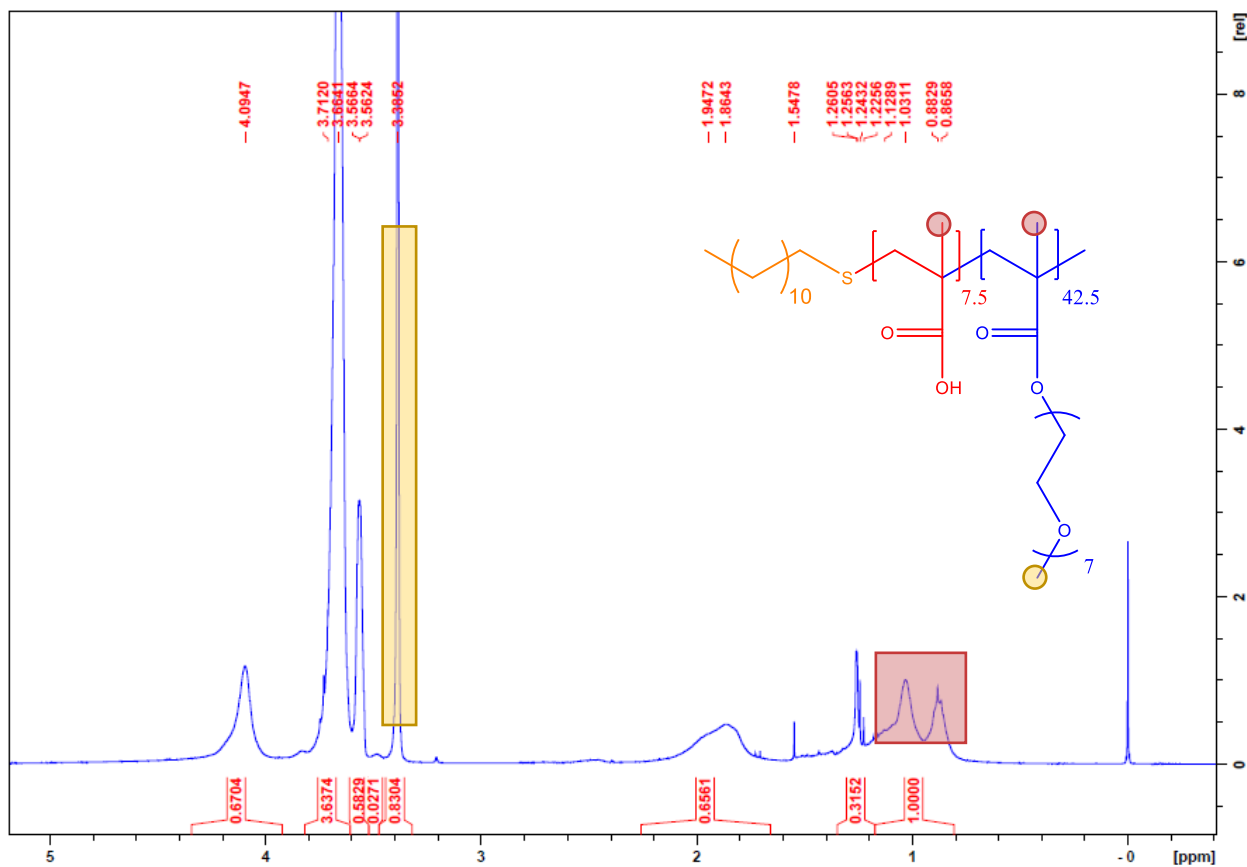

Figure S4.  $^1\text{H}$  NMR spectrum of linear (co)polymer DDT-*p*(OEGMA<sub>42.5</sub>-*co*-MAA<sub>7.5</sub>)

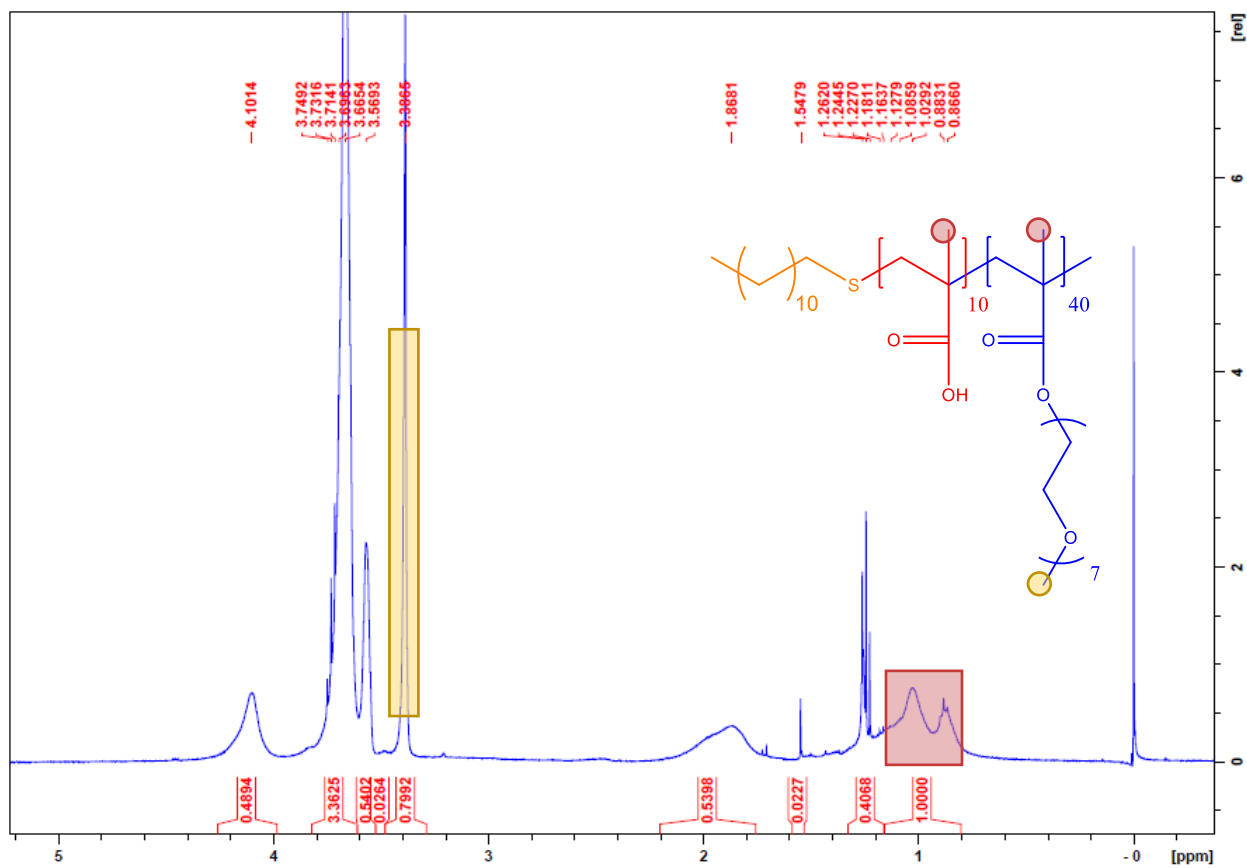

Figure S5. <sup>1</sup>H NMR spectrum of linear (co)polymer DDT-*p*(OEGMA<sub>40</sub>-*co*-MAA<sub>10</sub>)

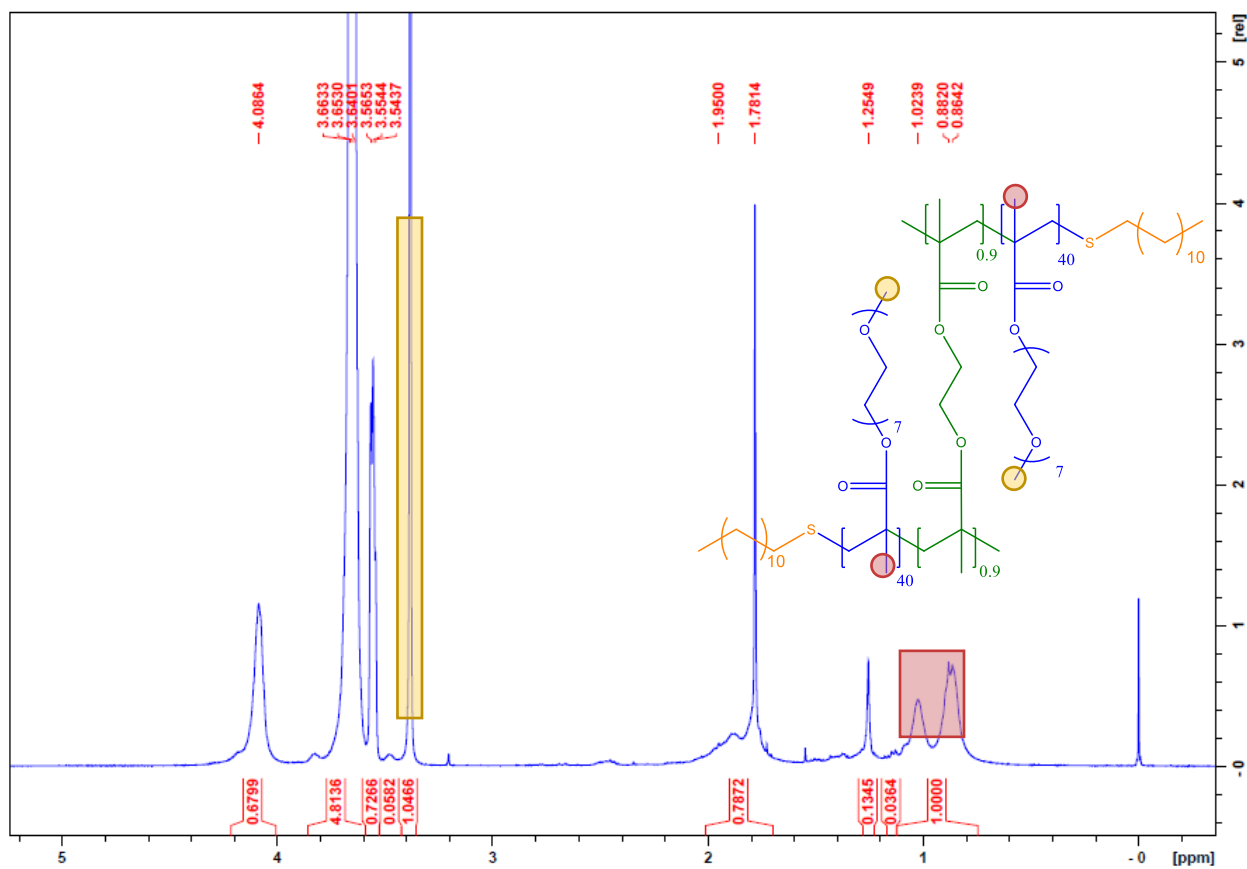

Figure S6. <sup>1</sup>H NMR spectrum of branched (co)polymer DDT-*p*(OEGMA<sub>50</sub>-*co*-EGDMA<sub>0.8</sub>)

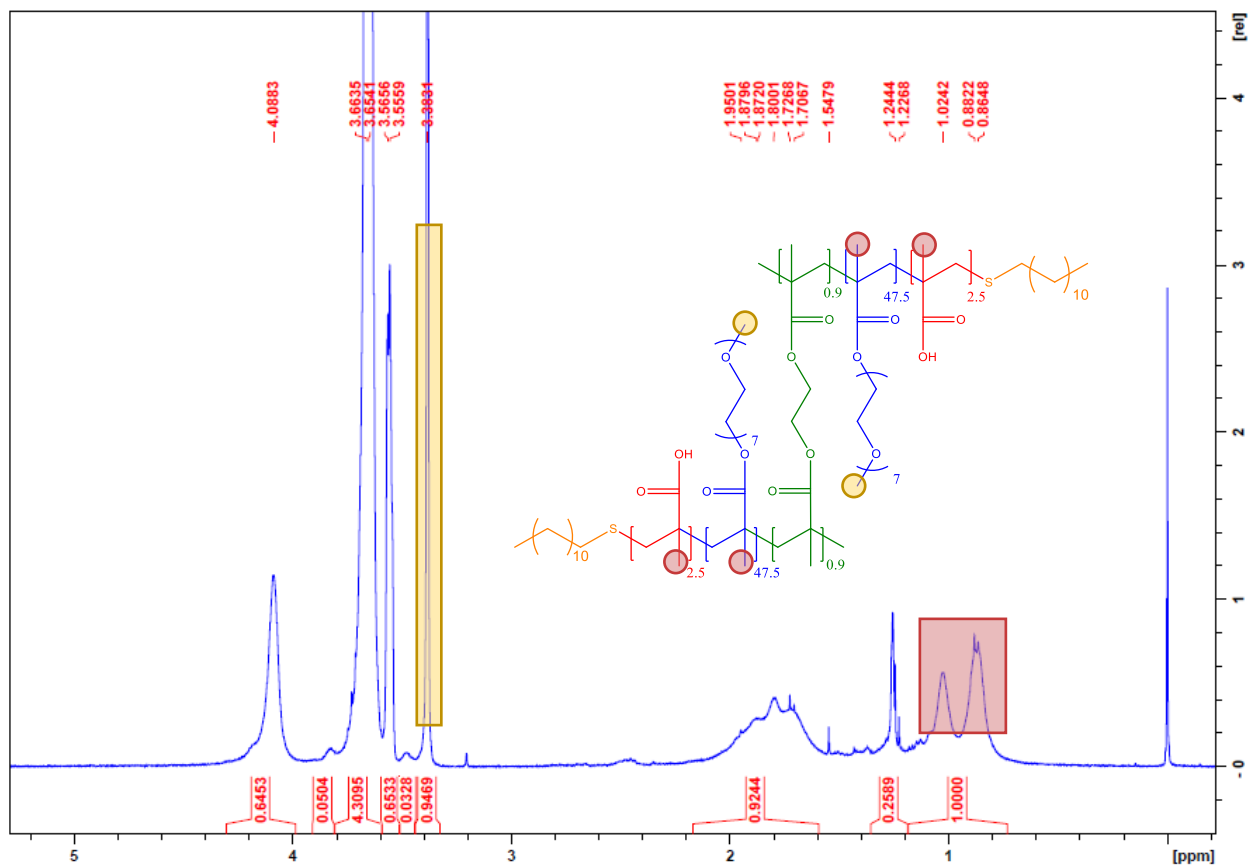

Figure S7. <sup>1</sup>H NMR spectrum of branched (co)polymer DDT-*p*(OEGMA<sub>47.5</sub>-*co*-MAA<sub>2.5</sub>-*co*-EGDMA<sub>0.9</sub>)

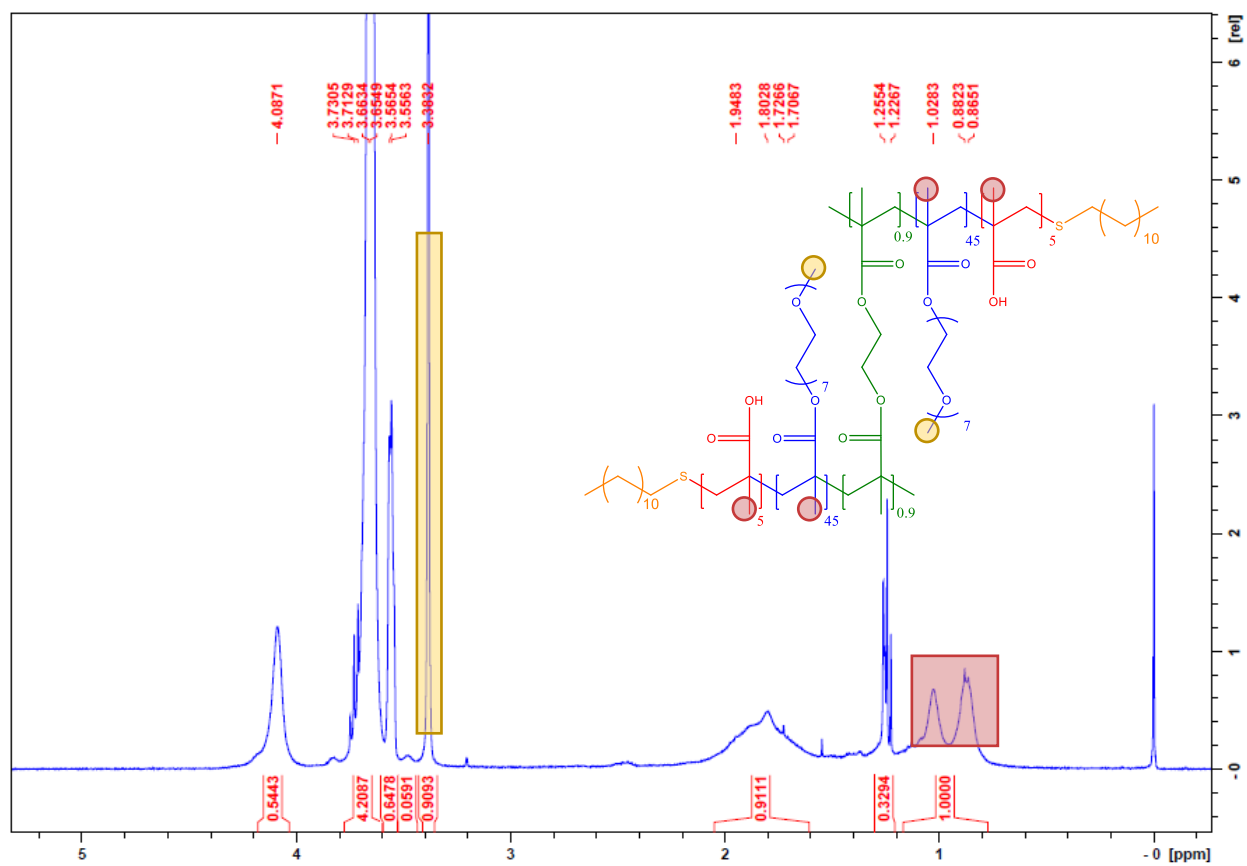

Figure S8. <sup>1</sup>H NMR spectrum of branched (co)polymer DDT-*p*(OEGMA<sub>45</sub>-*co*-MAA<sub>5</sub>-*co*-EGDMA<sub>0.9</sub>)

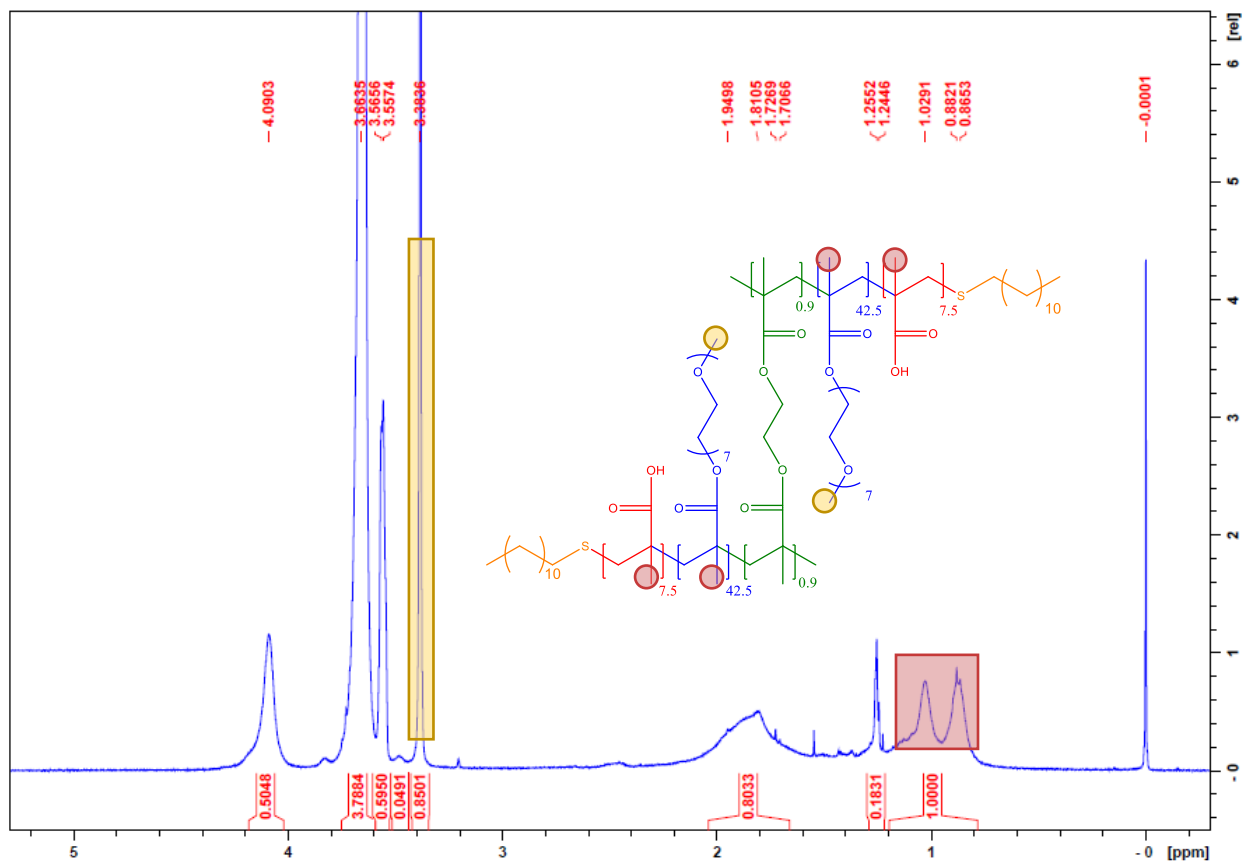

Figure S9.  $^1\text{H}$  NMR spectrum of branched (co)polymer DDT- $p(\text{OEGMA}_{42.5}\text{-co-MAA}_{7.5}\text{-co-EGDMA}_{0.9})$

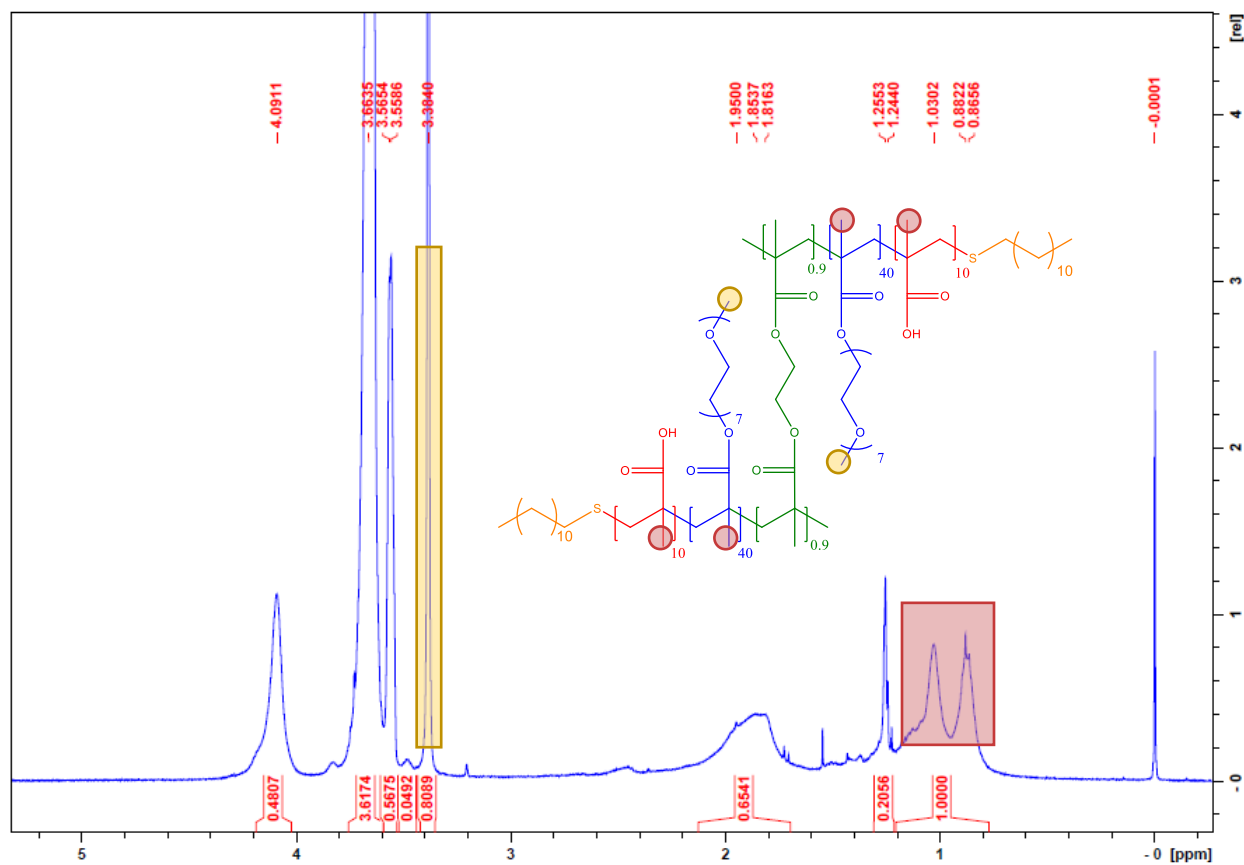

Figure S10.  $^1\text{H}$  NMR spectrum of branched (co)polymer DDT- $p(\text{OEGMA}_{40}\text{-co-MAA}_{10}\text{-co-EGDMA}_{0.9})$

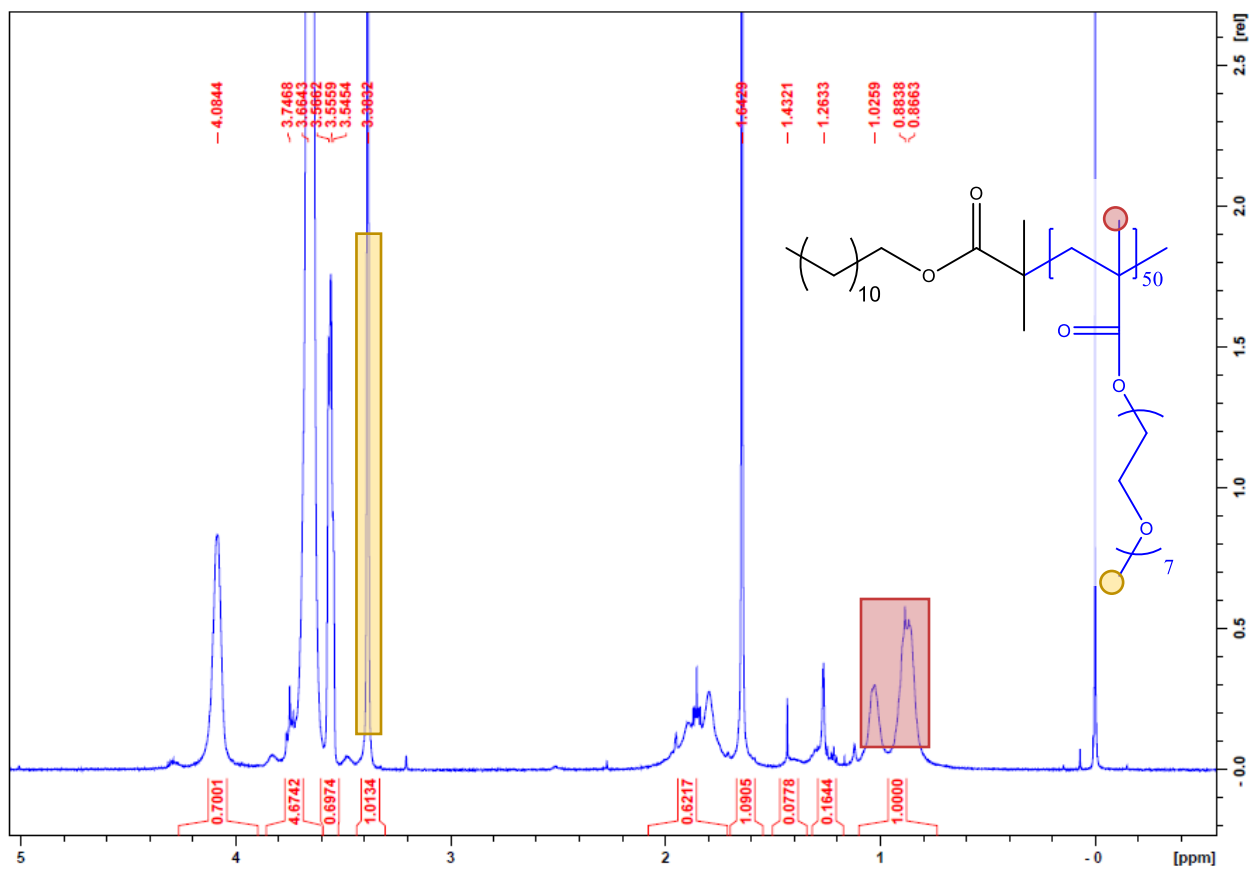

Figure S11.  $^1\text{H}$  NMR spectrum of linear homo-polymer DBIB-*p*(OEGMA<sub>50</sub>)

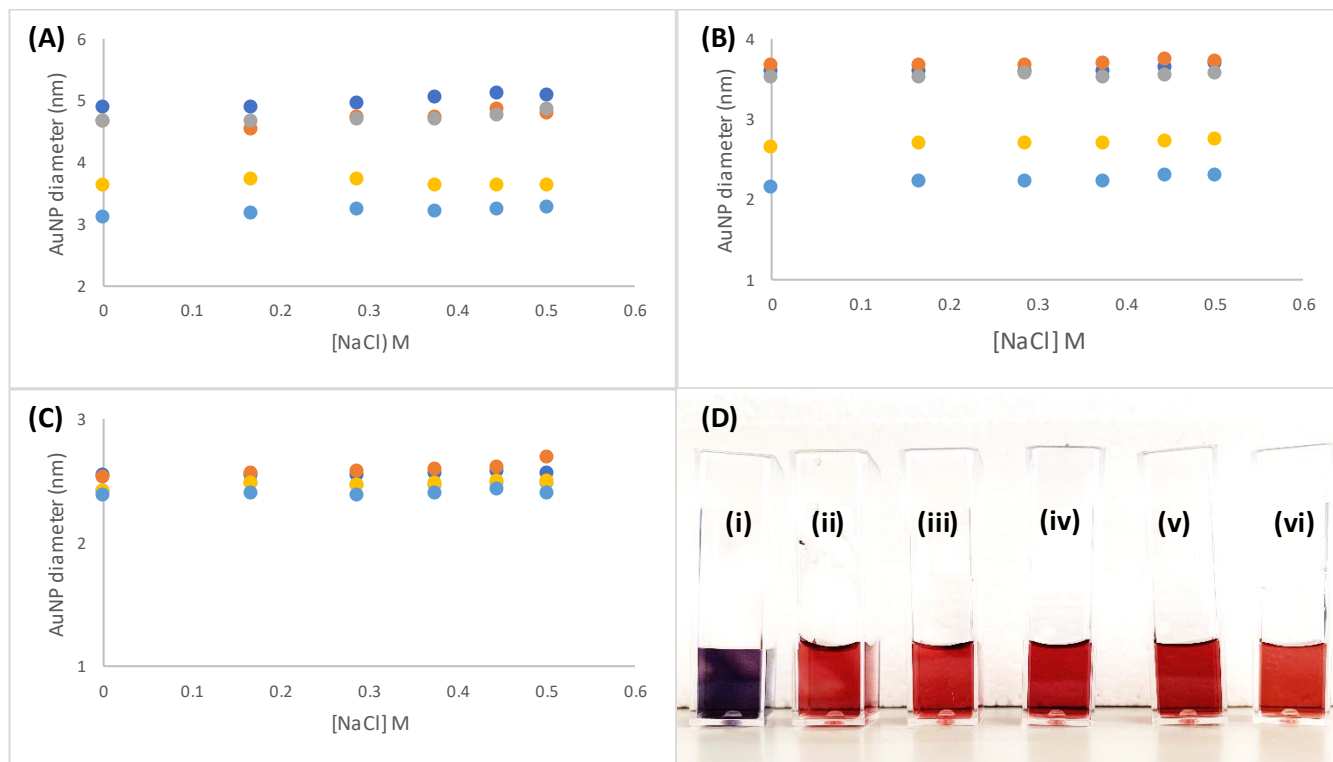

Figure S12. Salt stability studies for AuNP dispersions prepared with linear polymeric stabilisers at (a) 9:1, (b) 18:1 and (c) 35:1 P:Au mass ratios. Plots represent NaCl titrations for AuNP solutions bearing polymeric structures with varying MAA:OEGMA ratio; DDT-*p*(OEGMA<sub>50</sub>) (dark blue); DDT-*p*(OEGMA<sub>47.5-co</sub>-MAA<sub>2.5</sub>) (orange); DDT-*p*(OEGMA<sub>45-co</sub>-MAA<sub>5</sub>) (grey); DDT-*p*(OEGMA<sub>42.5-co</sub>-MAA<sub>7.5</sub>) (yellow); DDT-*p*(OEGMA<sub>40-co</sub>-MAA<sub>10</sub>) (light blue). Green corresponds to the UV-vis trace of the control AuNP sample bearing no polymeric stabiliser. (d) shows a photograph of solutions following addition of 0.55 M NaCl to AuNPs bearing (i) no polymeric stabiliser; (ii) DDT-*p*(OEGMA<sub>50</sub>); (iii) DDT-*p*(OEGMA<sub>47.5-co</sub>-MAA<sub>2.5</sub>); (iv) DDT-*p*(OEGMA<sub>45-co</sub>-MAA<sub>5</sub>); (v) DDT-*p*(OEGMA<sub>42.5-co</sub>-MAA<sub>7.5</sub>); (vi) DDT-*p*(OEGMA<sub>40-co</sub>-MAA<sub>10</sub>).



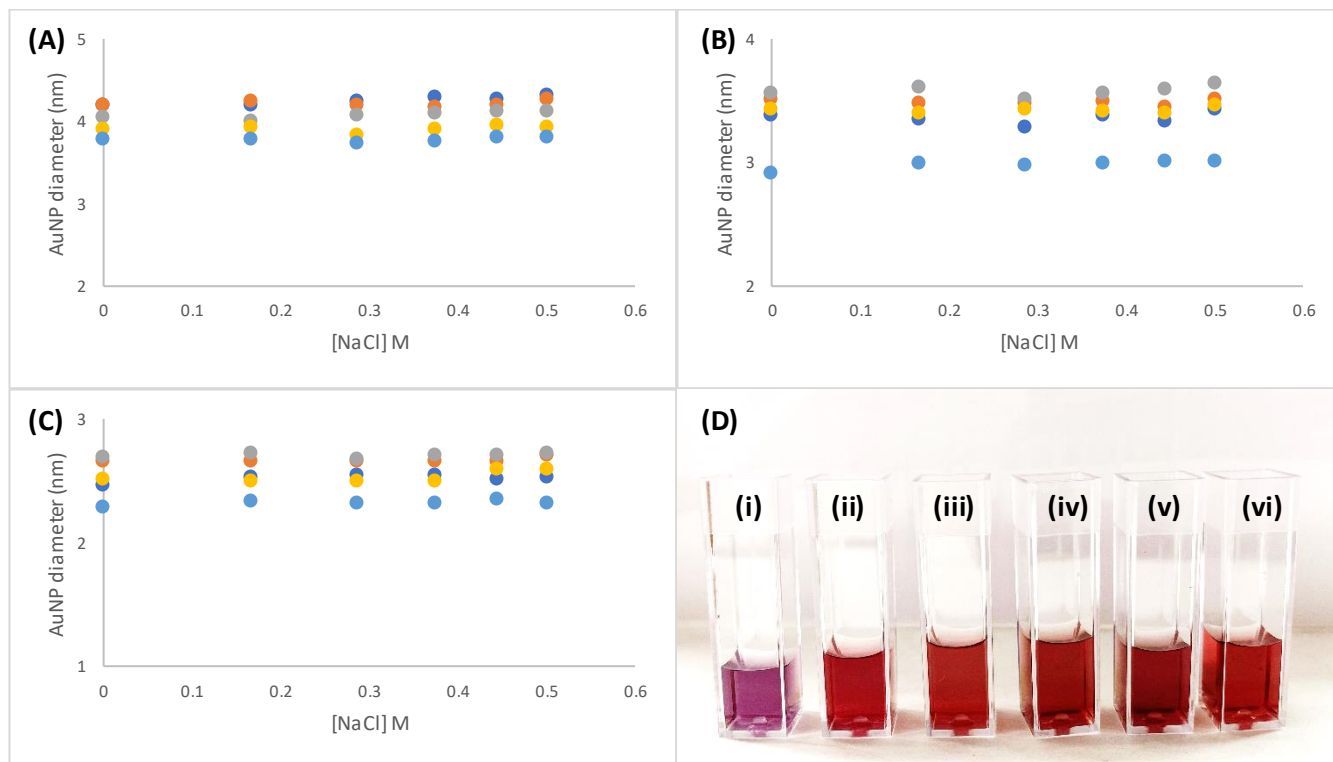

Figure S13. Salt stability studies for AuNP dispersions prepared with branched polymeric stabilisers at (a) 9:1, (b) 18:1 and (c) 35:1 P:Au mass ratios. Plots represent NaCl titrations for AuNP solutions bearing polymeric structures with varying MAA:OEGMA ratio; DDT- $p(\text{OEGMA}_{50}\text{-co-EGDMA}_{0.9})$  (dark blue); DDT- $p(\text{OEGMA}_{47.5}\text{-co-MAA}_{2.5}\text{-co-EGDMA}_{0.9})$  (orange); DDT- $p(\text{OEGMA}_{45}\text{-co-MAA}_{5}\text{-co-EGDMA}_{0.9})$  (grey); DDT- $p(\text{OEGMA}_{42.5}\text{-co-MAA}_{7.5}\text{-co-EGDMA}_{0.9})$  (yellow); DDT- $p(\text{OEGMA}_{40}\text{-co-MAA}_{10}\text{-co-EGDMA}_{0.9})$  (light blue). Green corresponds to the UV-vis trace of the control AuNP sample bearing no polymeric stabiliser. (d) shows a photograph of solutions following addition of 0.55 M NaCl to AuNPs bearing (i) no polymeric stabiliser; (ii) DDT- $p(\text{OEGMA}_{50}\text{-co-EGDMA}_{0.9})$ ; (iii) DDT- $p(\text{OEGMA}_{47.5}\text{-co-MAA}_{2.5}\text{-co-EGDMA}_{0.9})$ ; (iv) DDT- $p(\text{OEGMA}_{45}\text{-co-MAA}_{5}\text{-co-EGDMA}_{0.9})$ ; (v) DDT- $p(\text{OEGMA}_{42.5}\text{-co-MAA}_{7.5}\text{-co-EGDMA}_{0.9})$ ; (vi) DDT- $p(\text{OEGMA}_{40}\text{-co-MAA}_{10}\text{-co-EGDMA}_{0.9})$ .

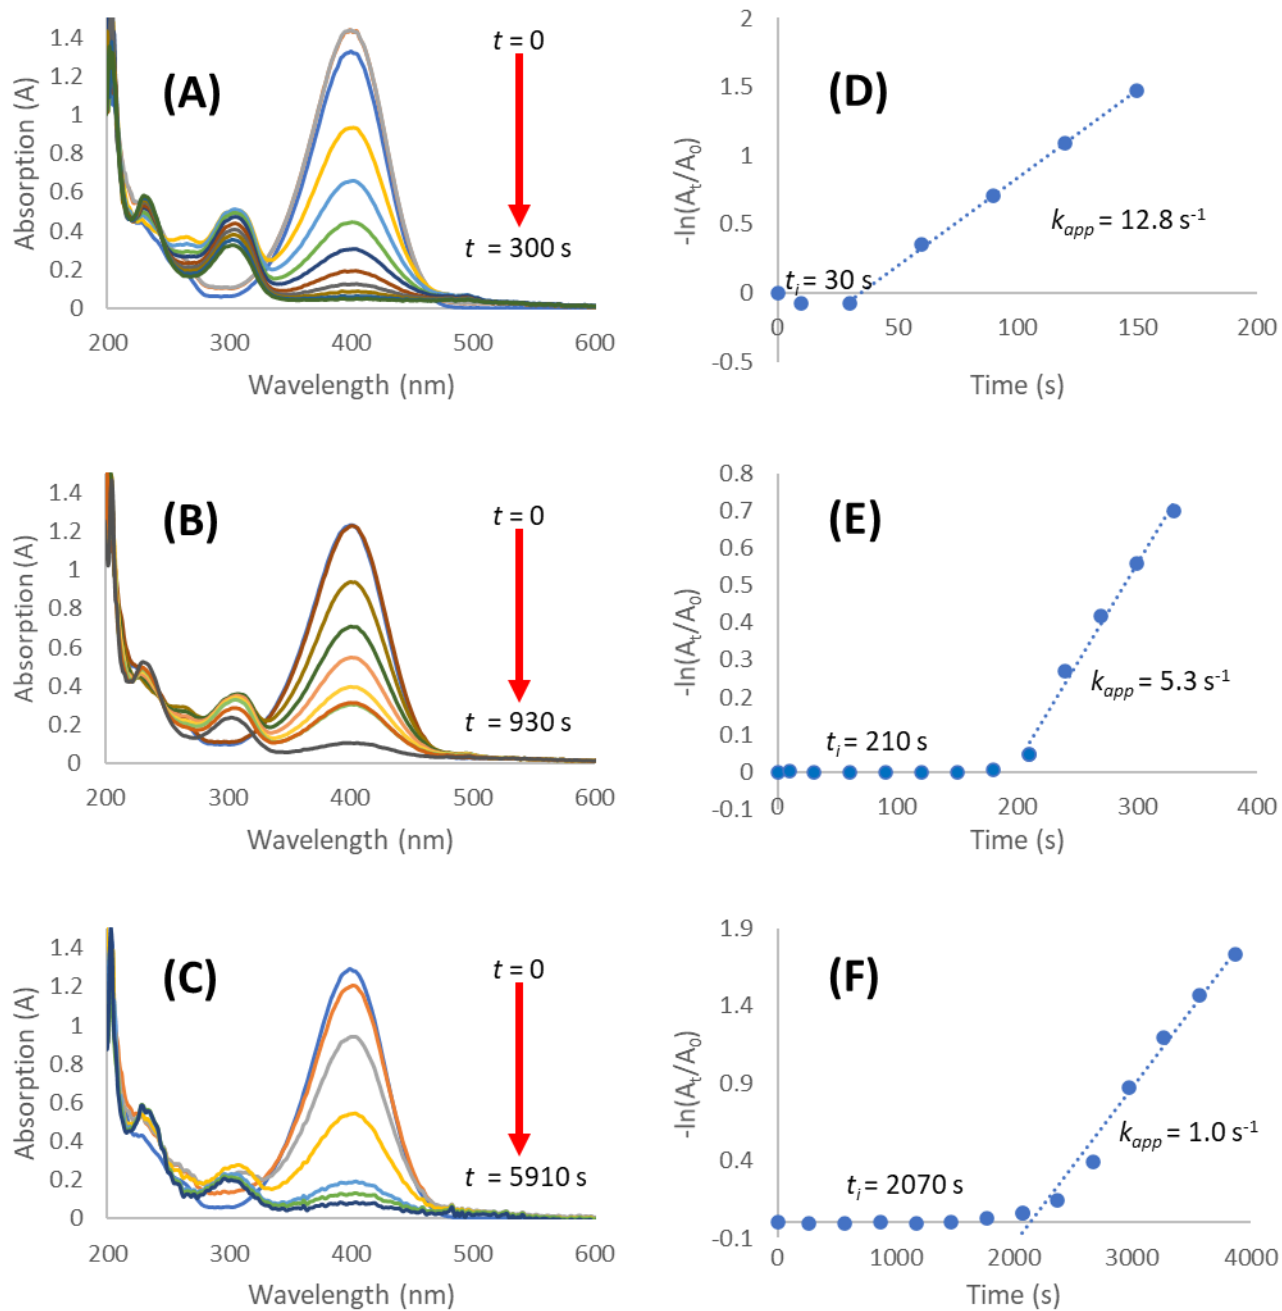

Figure S14. DDT-*p*(OEGMA<sub>50</sub>) catalytic reduction of 4-NP to 4-AP. A - C show UV-vis absorption traces for (A) 9:1, (B) 18:1 and (C) 35:1 P:Au mass ratios. D - F show  $-\ln(A_t/A_0)$  vs.  $t$  plots used to determine apparent rate constant ( $k_{app}$ ) and induction times ( $t_i$ ) for (D) 9:1, (E) 18:1 and (F) 35:1 P:Au mass ratios.

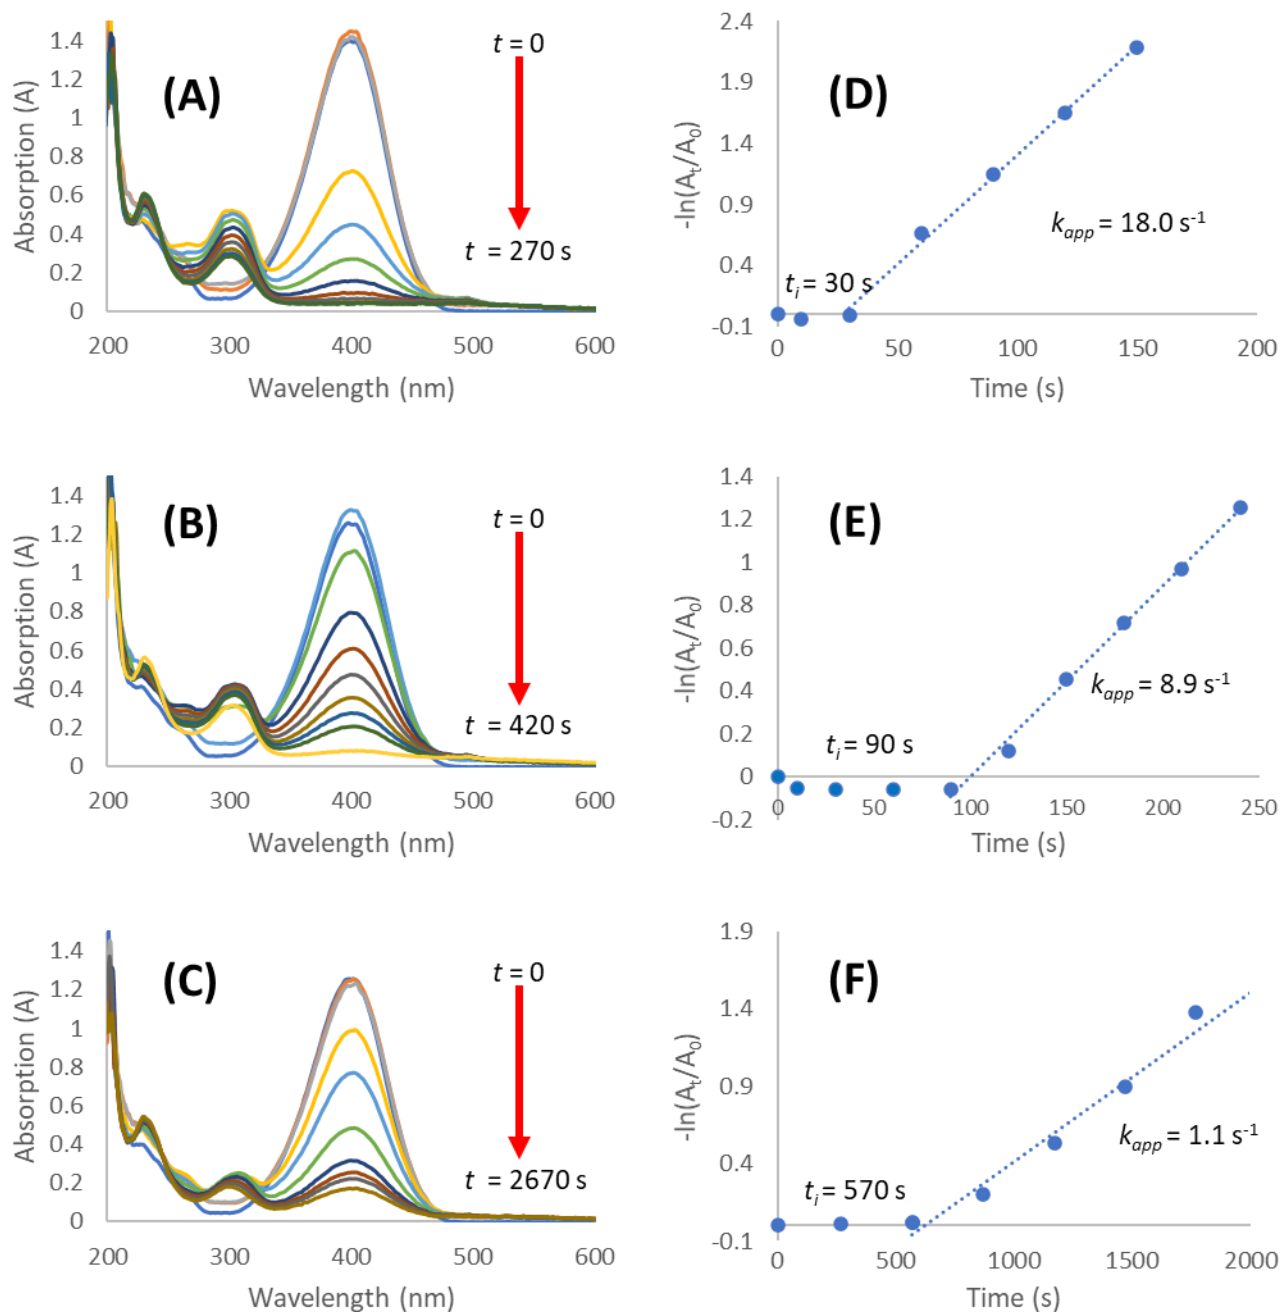

Figure S15. DDT-*p*(OEGMA<sub>47.5</sub>-*co*-MAA<sub>2.5</sub>) catalytic reduction of 4-NP to 4-AP. A - C show UV-vis absorption traces for (A) 9:1, (B) 18:1 and (C) 35:1 P:Au mass ratios. D - F show  $-\ln(A_t/A_0)$  vs.  $t$  plots used to determine apparent rate constant ( $k_{app}$ ) and induction times ( $t_i$ ) for (D) 9:1, (E) 18:1 and (F) 35:1 P:Au mass ratios.

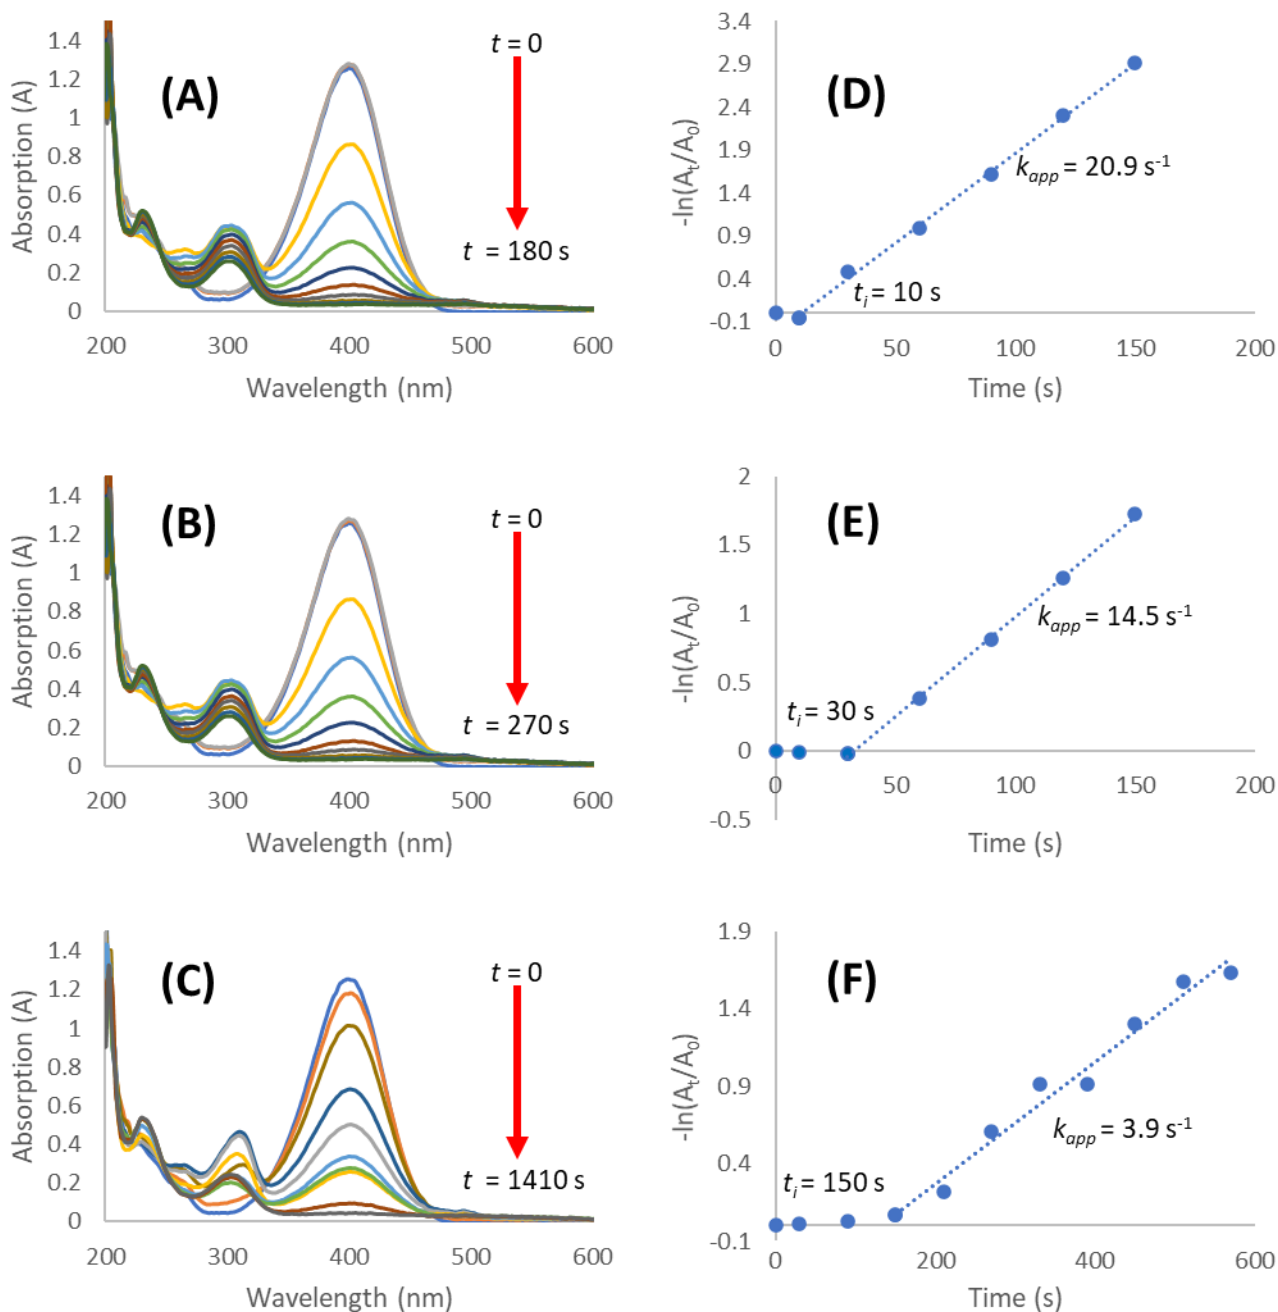

Figure S16. DDT-*p*(OEGMA<sub>45</sub>-*co*-MAAs) catalytic reduction of 4-NP to 4-AP. A - C show UV-vis absorption traces for (A) 9:1, (B) 18:1 and (C) 35:1 P:Au mass ratios. D - F show  $-\ln(A_t/A_0)$  vs.  $t$  plots used to determine apparent rate constant ( $k_{app}$ ) and induction times ( $t_i$ ) for (D) 9:1, (E) 18:1 and (F) 35:1 P:Au mass ratios.

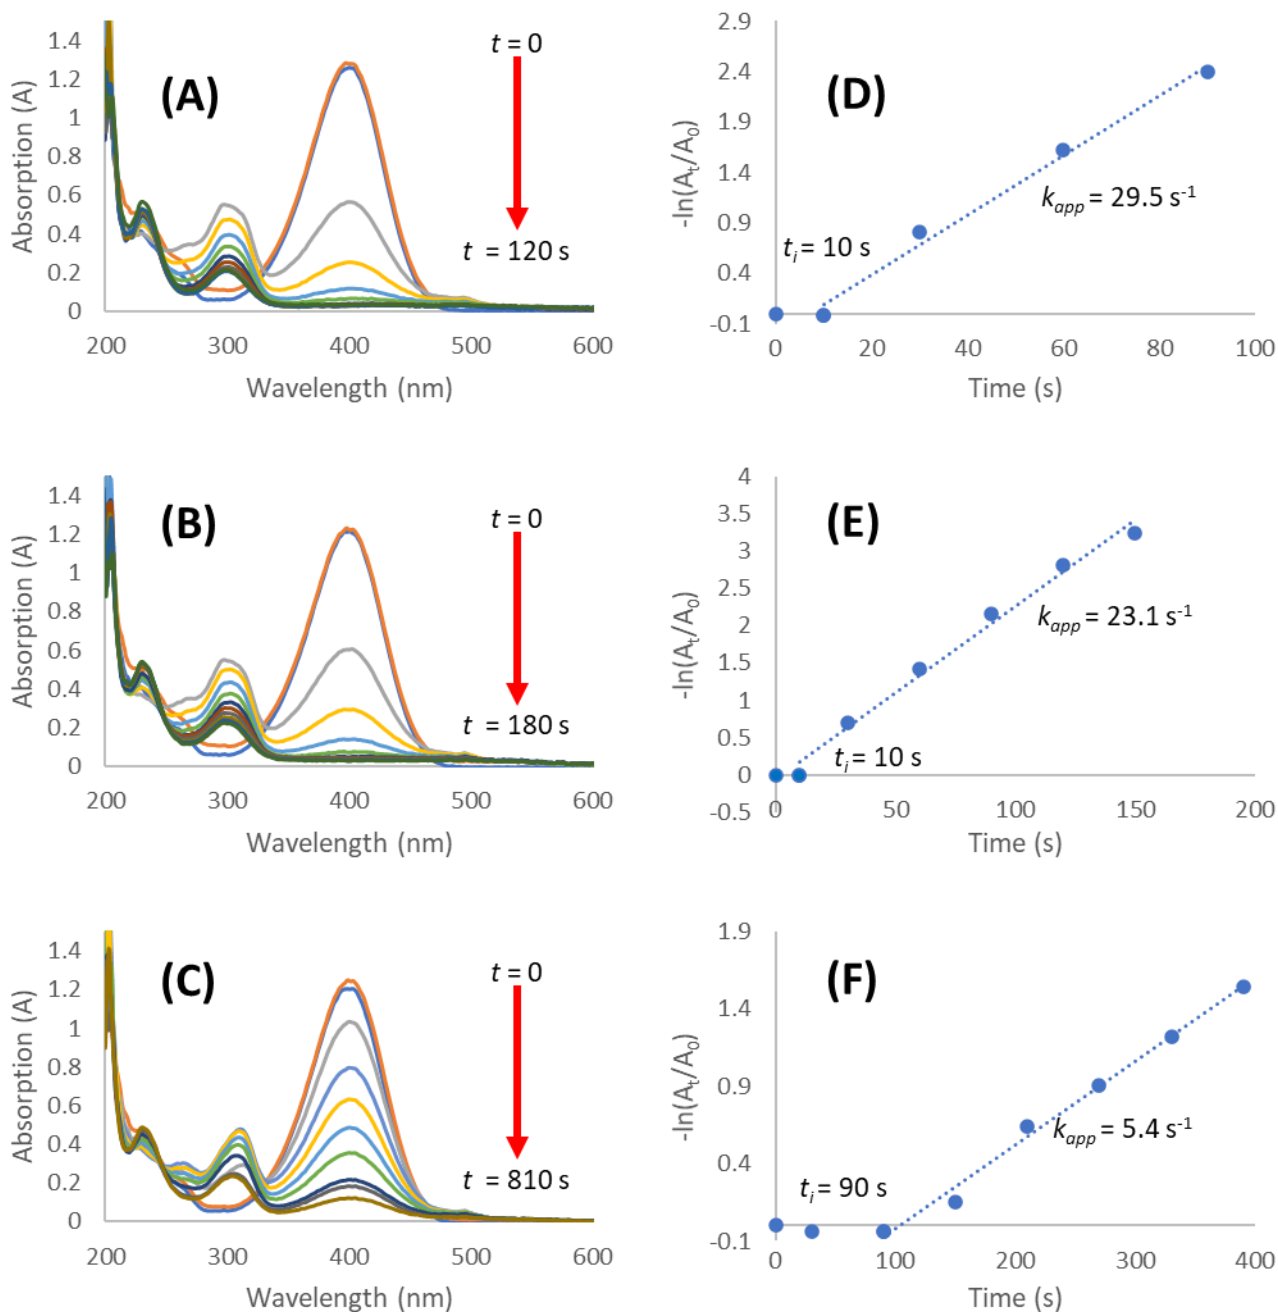

Figure S17. DDT-*p*(OEGMA<sub>42.5</sub>-*co*-MAA<sub>7.5</sub>) catalytic reduction of 4-NP to 4-AP. A - C show UV-vis absorption traces for (A) 9:1, (B) 18:1 and (C) 35:1 P:Au mass ratios. D - F show  $-\ln(A_t/A_0)$  vs.  $t$  plots used to determine apparent rate constant ( $k_{app}$ ) and induction times ( $t_i$ ) for (D) 9:1, (E) 18:1 and (F) 35:1 P:Au mass ratios.

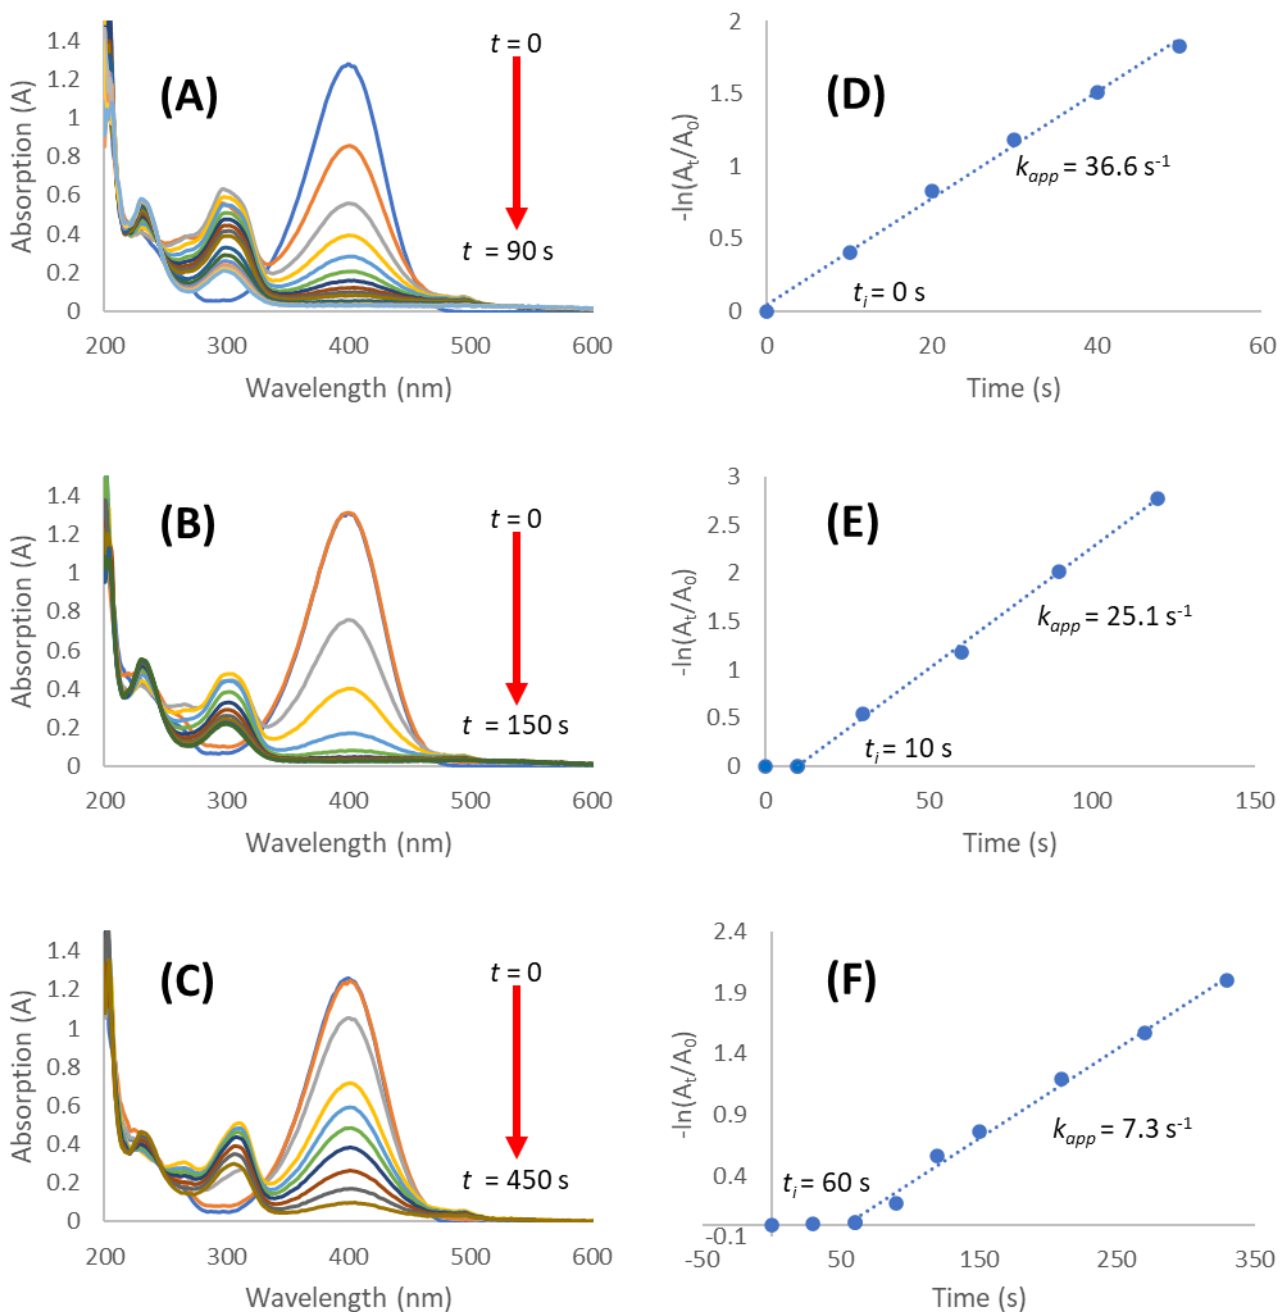

Figure S18. DDT- $p(\text{OEGMA}_{40}\text{-co-MAA}_{10})$  catalytic reduction of 4-NP to 4-AP. A - C show UV-vis absorption traces for (A) 9:1, (B) 18:1 and (C) 35:1 P:Au mass ratios. D - F show  $-\ln(A_t/A_0)$  vs.  $t$  plots used to determine apparent rate constant ( $k_{app}$ ) and induction times ( $t_i$ ) for (D) 9:1, (E) 18:1 and (F) 35:1 P:Au mass ratios.

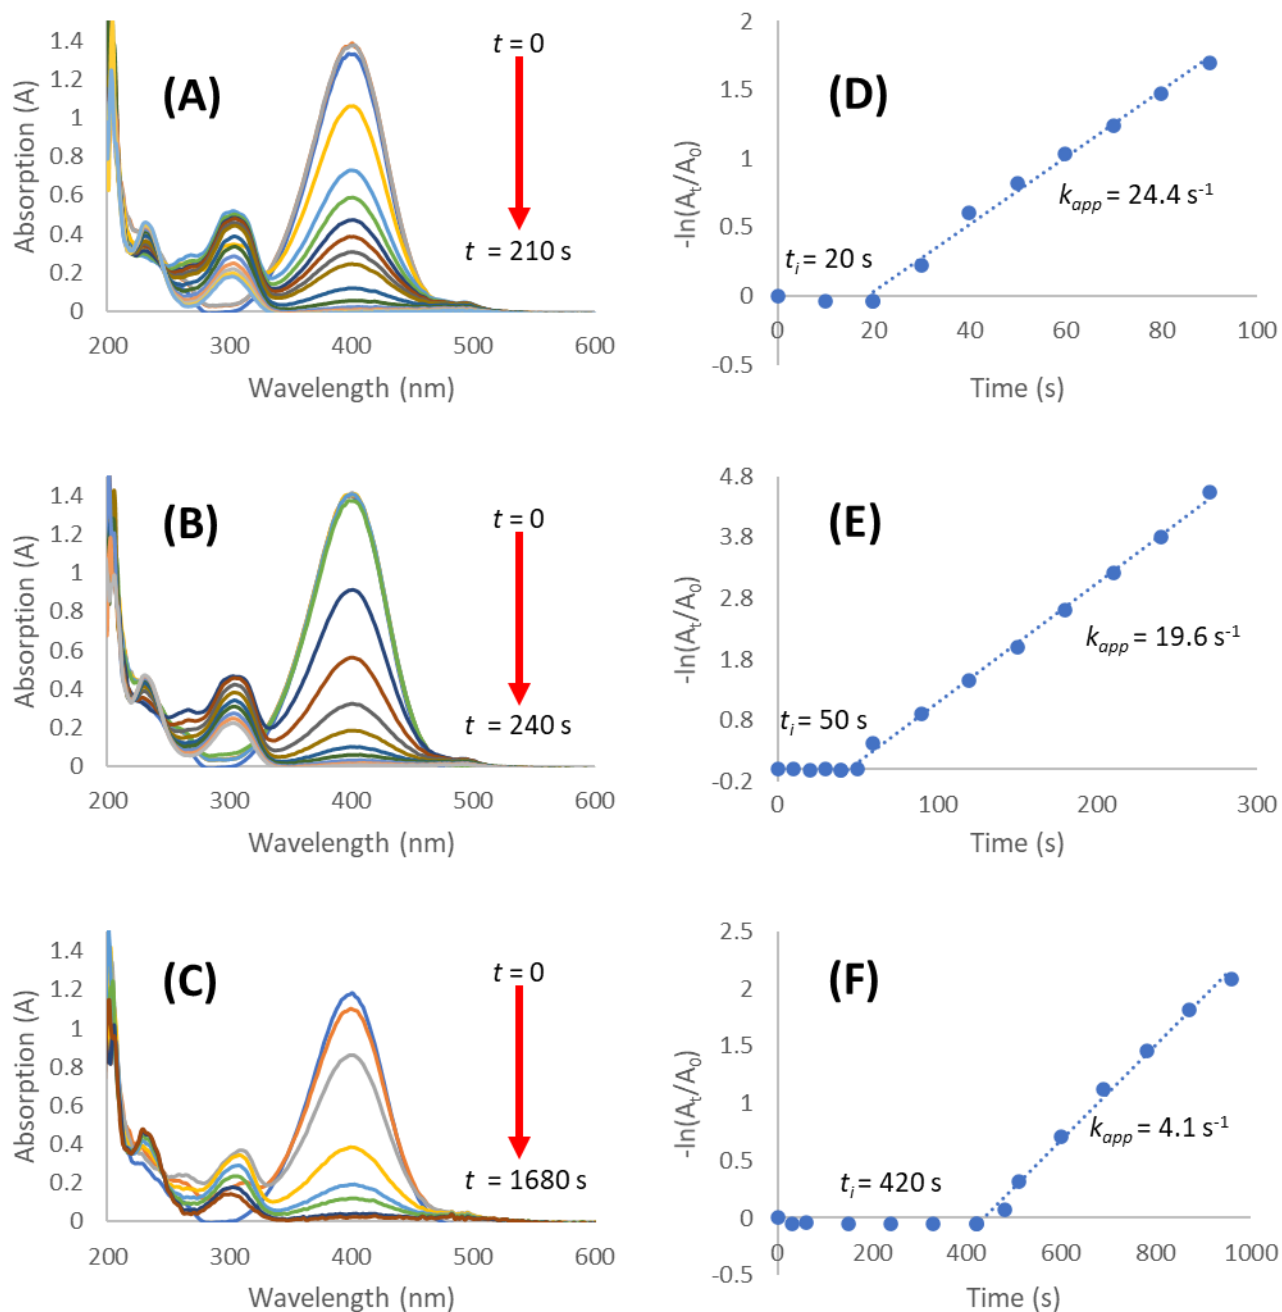

Figure S19. DDT-*p*(OEGMA<sub>50</sub>-*co*-EGDMA<sub>0.9</sub>) catalytic reduction of 4-NP to 4-AP. A - C show UV-vis absorption traces for (A) 9:1, (B) 18:1 and (C) 35:1 P:Au mass ratios. D - F show  $-\ln(A_t/A_0)$  vs.  $t$  plots used to determine apparent rate constant ( $k_{app}$ ) and induction times ( $t_i$ ) for (D) 9:1, (E) 18:1 and (F) 35:1 P:Au mass ratios.

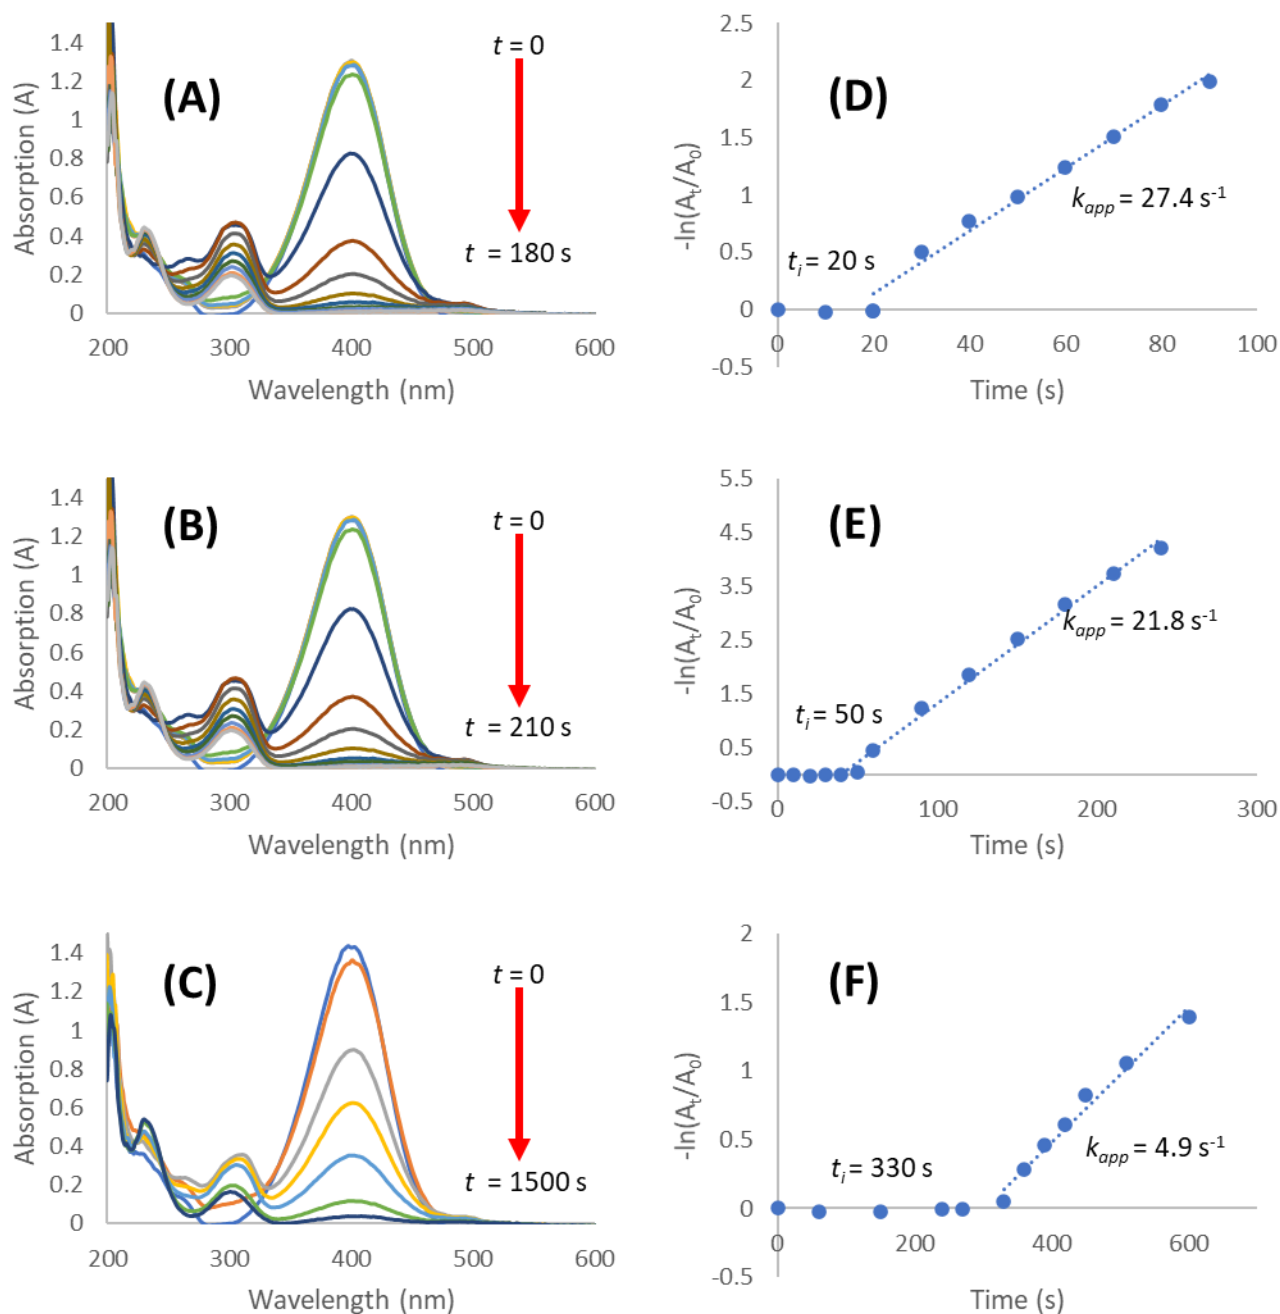

Figure S20. DDT- $p(\text{OEGMA}_{47.5}\text{-co-MAA}_{2.5}\text{-co-EGDMA}_{0.9})$  catalytic reduction of 4-NP to 4-AP. A - C show UV-vis absorption traces for (A) 9:1, (B) 18:1 and (C) 35:1 P:Au mass ratios. D - F show  $-\ln(A_t/A_0)$  vs.  $t$  plots used to determine apparent rate constant ( $k_{app}$ ) and induction times ( $t_i$ ) for (D) 9:1, (E) 18:1 and (F) 35:1 P:Au mass ratios.



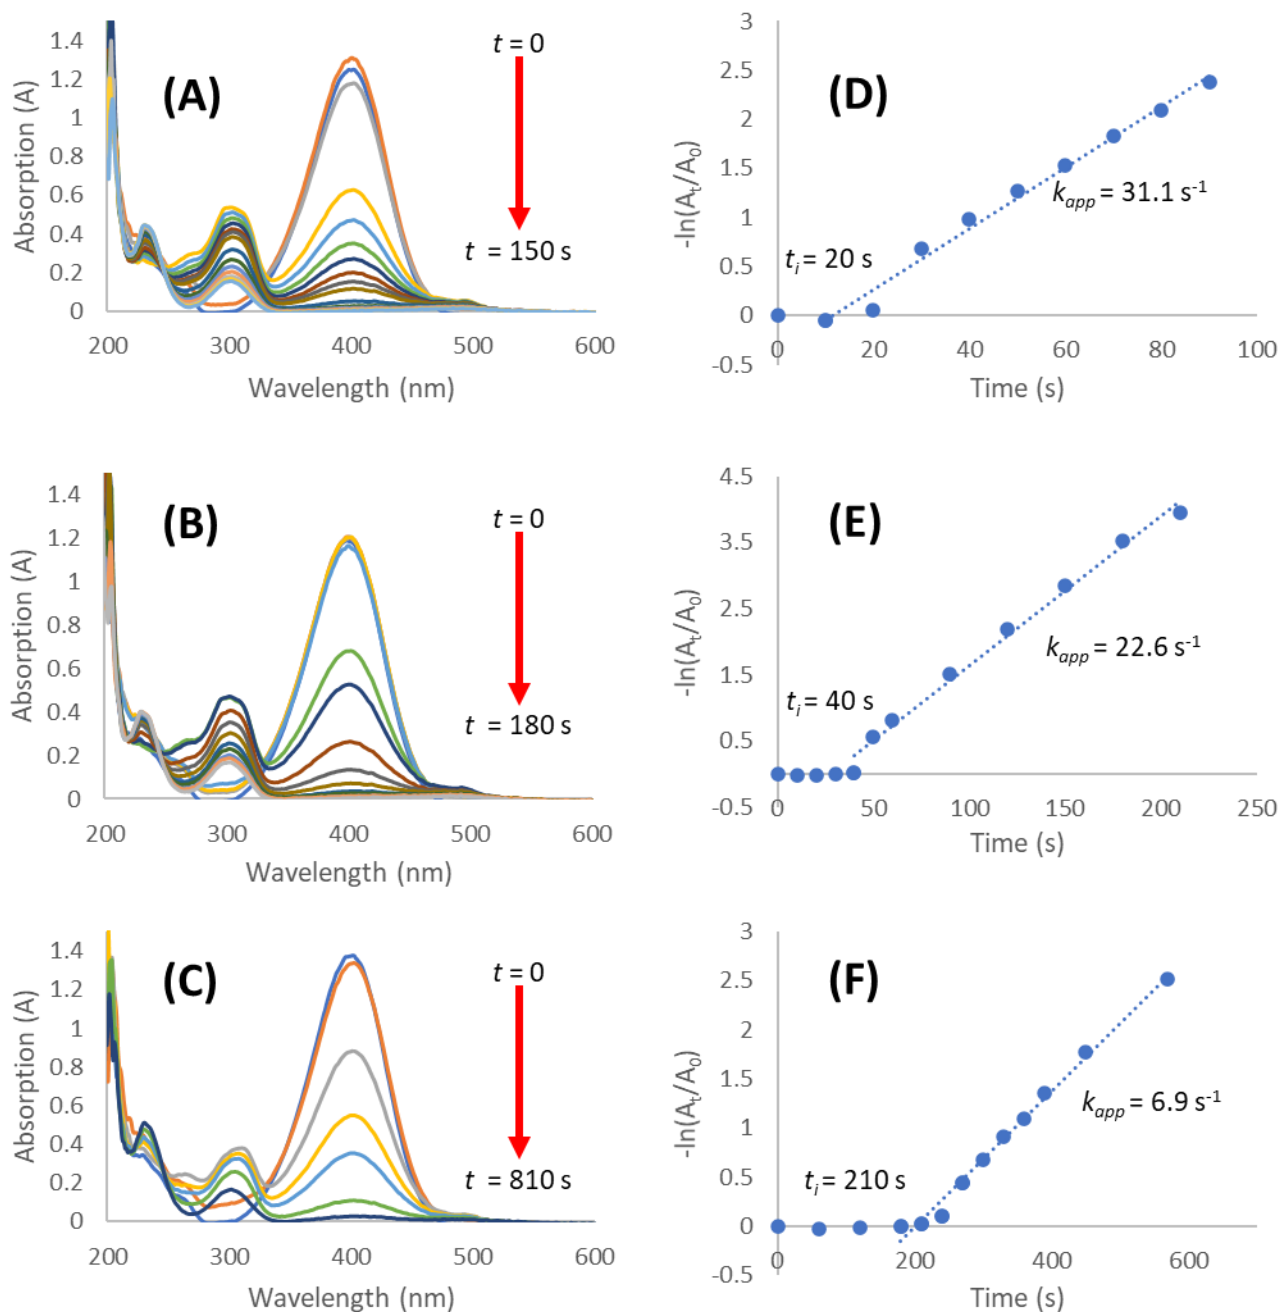

Figure S21. DDT-*p*(OEGMA<sub>45</sub>-*co*-MAA<sub>5</sub>-*co*-EGDMA<sub>0.9</sub>) catalytic reduction of 4-NP to 4-AP. A - C show UV-vis absorption traces for (A) 9:1, (B) 18:1 and (C) 35:1 P:Au mass ratios. D - F show  $-\ln(A_t/A_0)$  vs.  $t$  plots used to determine apparent rate constant ( $k_{app}$ ) and induction times ( $t_i$ ) for (D) 9:1, (E) 18:1 and (F) 35:1 P:Au mass ratios.

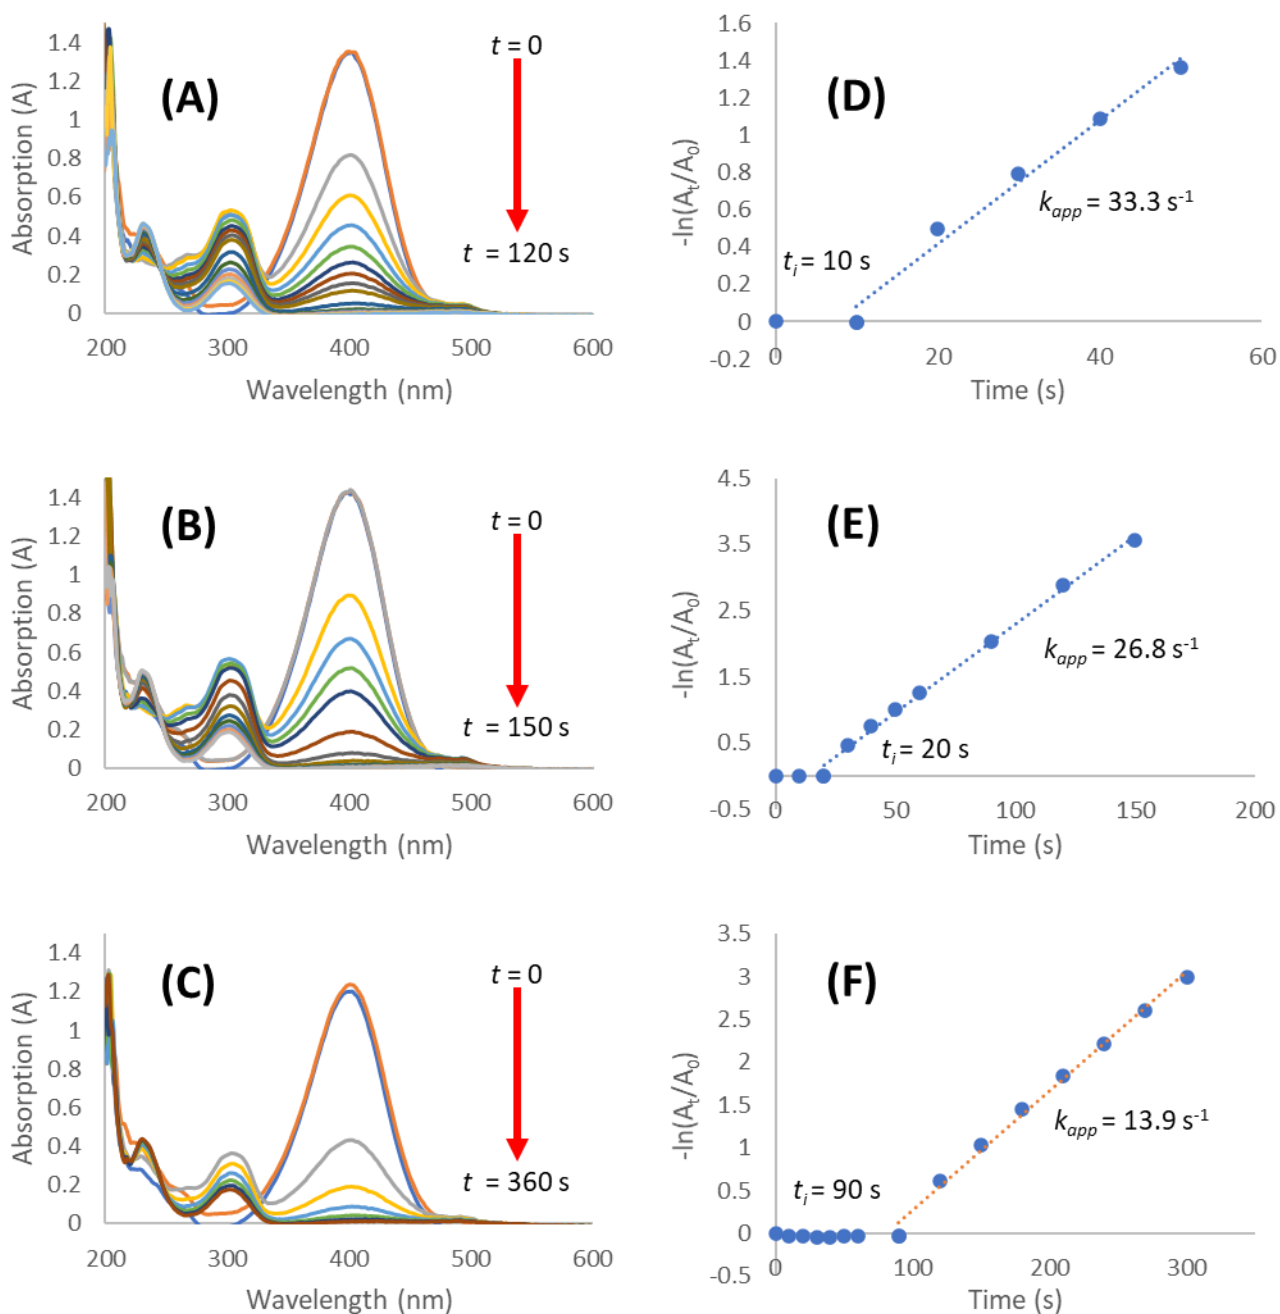

Figure S22. DDT- $p(\text{OEGMA}_{42.5}\text{-co-MAA}_{7.5}\text{-co-EGDMA}_{0.9})$  catalytic reduction of 4-NP to 4-AP. A - C show UV-vis absorption traces for (A) 9:1, (B) 18:1 and (C) 35:1 P:Au mass ratios. D - F show  $-\ln(A_t/A_0)$  vs.  $t$  plots used to determine apparent rate constant ( $k_{app}$ ) and induction times ( $t_i$ ) for (D) 9:1, (E) 18:1 and (F) 35:1 P:Au mass ratios.

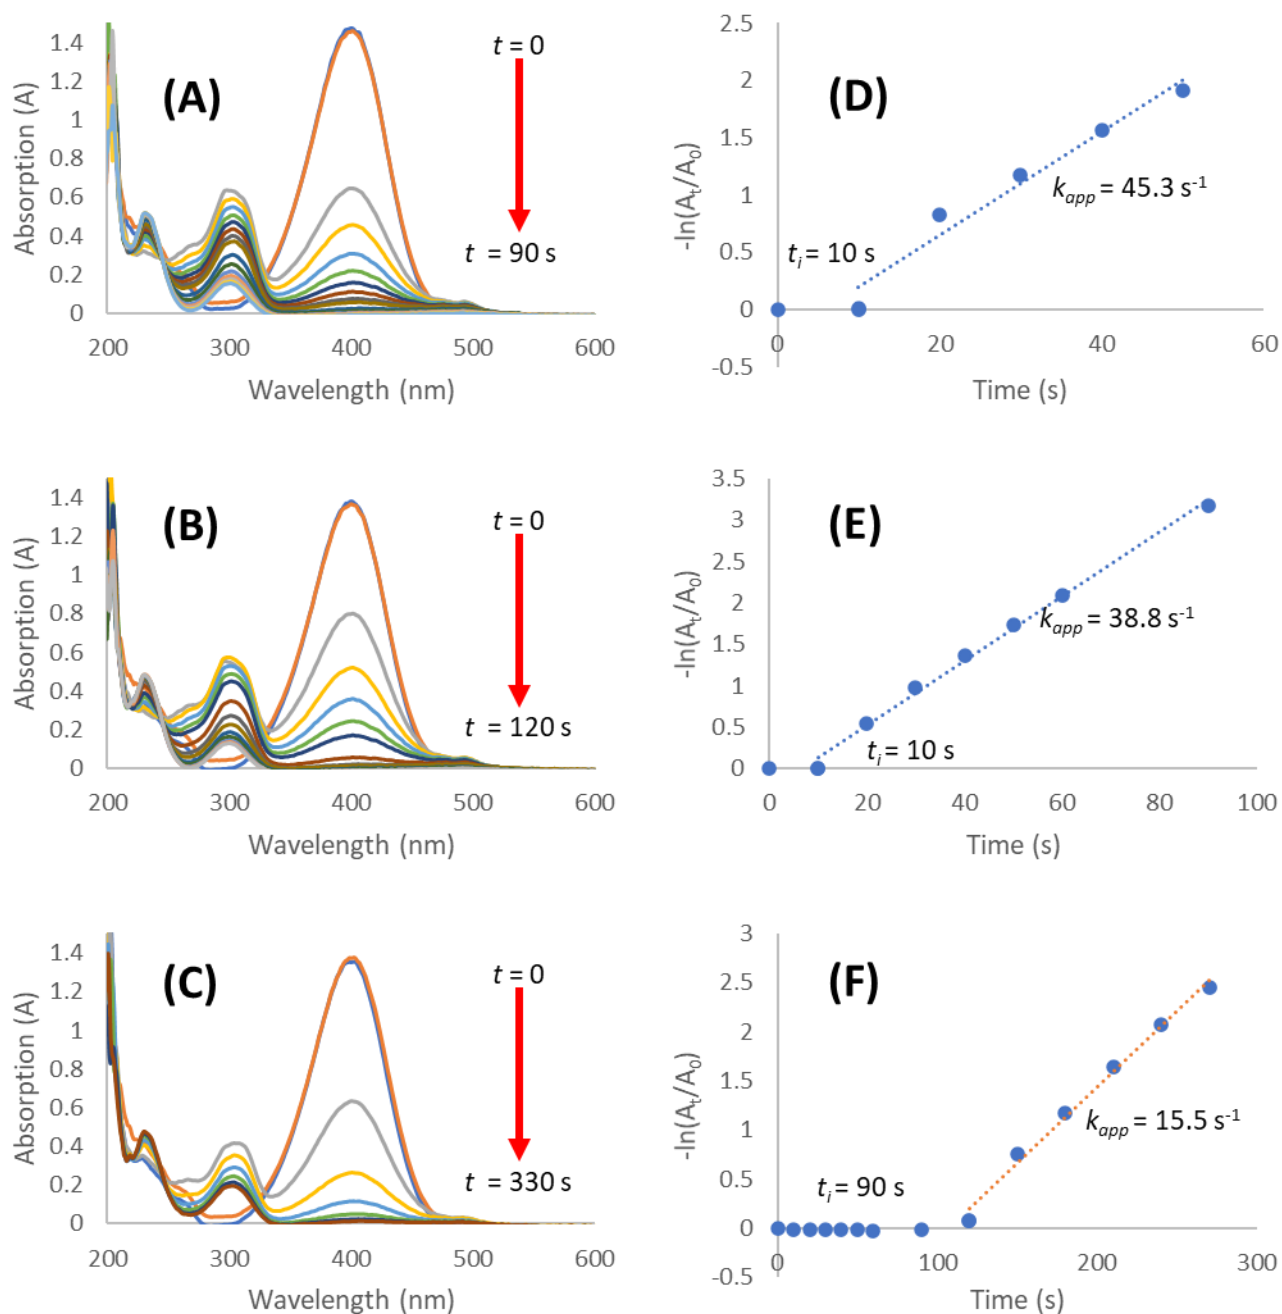

Figure S23. DDT-*p*(OEGMA<sub>40</sub>-*co*-MAA<sub>10</sub>-*co*-EGDMA<sub>0.9</sub>) catalytic reduction of 4-NP to 4-AP. A - C show UV-vis absorption traces for (A) 9:1, (B) 18:1 and (C) 35:1 P:Au mass ratios. D - F show  $-\ln(A_t/A_0)$  vs.  $t$  plots used to determine apparent rate constant ( $k_{app}$ ) and induction times ( $t_i$ ) for (D) 9:1, (E) 18:1 and (F) 35:1 P:Au mass ratios.

Table S1. Calculated apparent rate constants ( $k_{app}$ ) and induction times ( $t_i$ ) for each AuNP solution prepared using the library of employed polymeric stabilisers for the catalytic reduction of 4-NP to 4-AP, determined by UV-vis spectroscopy.

| Linear Homo-polymers and (co)polymers                                  |       |                           |              | Branched (co)polymers                                                                                    |       |                        |           |
|------------------------------------------------------------------------|-------|---------------------------|--------------|----------------------------------------------------------------------------------------------------------|-------|------------------------|-----------|
| Structure                                                              | P: Au | $k_{app}$<br>( $s^{-1}$ ) | $t_i$<br>(s) | Structure                                                                                                | P: Au | $k_{app}$ ( $s^{-1}$ ) | $t_i$ (s) |
| DDT- <i>p</i> (OEGMA <sub>50</sub> )                                   | 9:1   | 12.8                      | 30           | DDT- <i>p</i> (OEGMA <sub>50</sub> - <i>co</i> -EGDMA <sub>0.9</sub> )                                   | 9:1   | 24.4                   | 20        |
|                                                                        | 18:1  | 5.3                       | 210          |                                                                                                          | 18:1  | 19.6                   | 50        |
|                                                                        | 35:1  | 1.0                       | 2070         |                                                                                                          | 35:1  | 4.1                    | 420       |
| DDT- <i>p</i> (OEGMA <sub>47.5</sub> - <i>co</i> -MAA <sub>2.5</sub> ) | 9:1   | 18.0                      | 30           | DDT- <i>p</i> (OEGMA <sub>47.5</sub> - <i>co</i> -MAA <sub>2.5</sub> - <i>co</i> -EGDMA <sub>0.9</sub> ) | 9:1   | 27.4                   | 20        |
|                                                                        | 18:1  | 8.9                       | 90           |                                                                                                          | 18:1  | 21.8                   | 50        |
|                                                                        | 35:1  | 1.1                       | 570          |                                                                                                          | 35:1  | 4.9                    | 330       |
| DDT- <i>p</i> (OEGMA <sub>45</sub> - <i>co</i> -MAA <sub>5</sub> )     | 9:1   | 20.9                      | 10           | DDT- <i>p</i> (OEGMA <sub>45</sub> - <i>co</i> -MAA <sub>5</sub> - <i>co</i> -EGDMA <sub>0.9</sub> )     | 9:1   | 31.1                   | 20        |
|                                                                        | 18:1  | 14.5                      | 30           |                                                                                                          | 18:1  | 22.6                   | 40        |
|                                                                        | 35:1  | 3.9                       | 150          |                                                                                                          | 35:1  | 6.9                    | 210       |
| DDT- <i>p</i> (OEGMA <sub>42.5</sub> - <i>co</i> -MAA <sub>7.5</sub> ) | 9:1   | 29.5                      | 10           | DDT- <i>p</i> (OEGMA <sub>42.5</sub> - <i>co</i> -MAA <sub>7.5</sub> - <i>co</i> -EGDMA <sub>0.9</sub> ) | 9:1   | 33.3                   | 10        |
|                                                                        | 18:1  | 23.1                      | 10           |                                                                                                          | 18:1  | 26.8                   | 20        |
|                                                                        | 35:1  | 5.4                       | 90           |                                                                                                          | 35:1  | 13.9                   | 90        |
| DDT- <i>p</i> (OEGMA <sub>40</sub> - <i>co</i> -MAA <sub>10</sub> )    | 9:1   | 36.6                      | 0            | DDT- <i>p</i> (OEGMA <sub>40</sub> - <i>co</i> -MAA <sub>10</sub> - <i>co</i> -EGDMA <sub>0.9</sub> )    | 9:1   | 45.3                   | 10        |
|                                                                        | 18:1  | 25.1                      | 10           |                                                                                                          | 18:1  | 38.8                   | 10        |
|                                                                        | 35:1  | 7.3                       | 60           |                                                                                                          | 35:1  | 15.5                   | 90        |
